# Supplementary material for: Evaluation of modeled global carbon dynamics: analysis based on global carbon flux and above-ground biomass data
Source: Copernicus journal article supplement (doi:10.5194/bg-2016-142), 2016-04-25
Supplement: Supplementary file 1 [file bg-2016-142-supplement.pdf]

**Fig. S1** Location of plots and flux sits for model calibration and validation

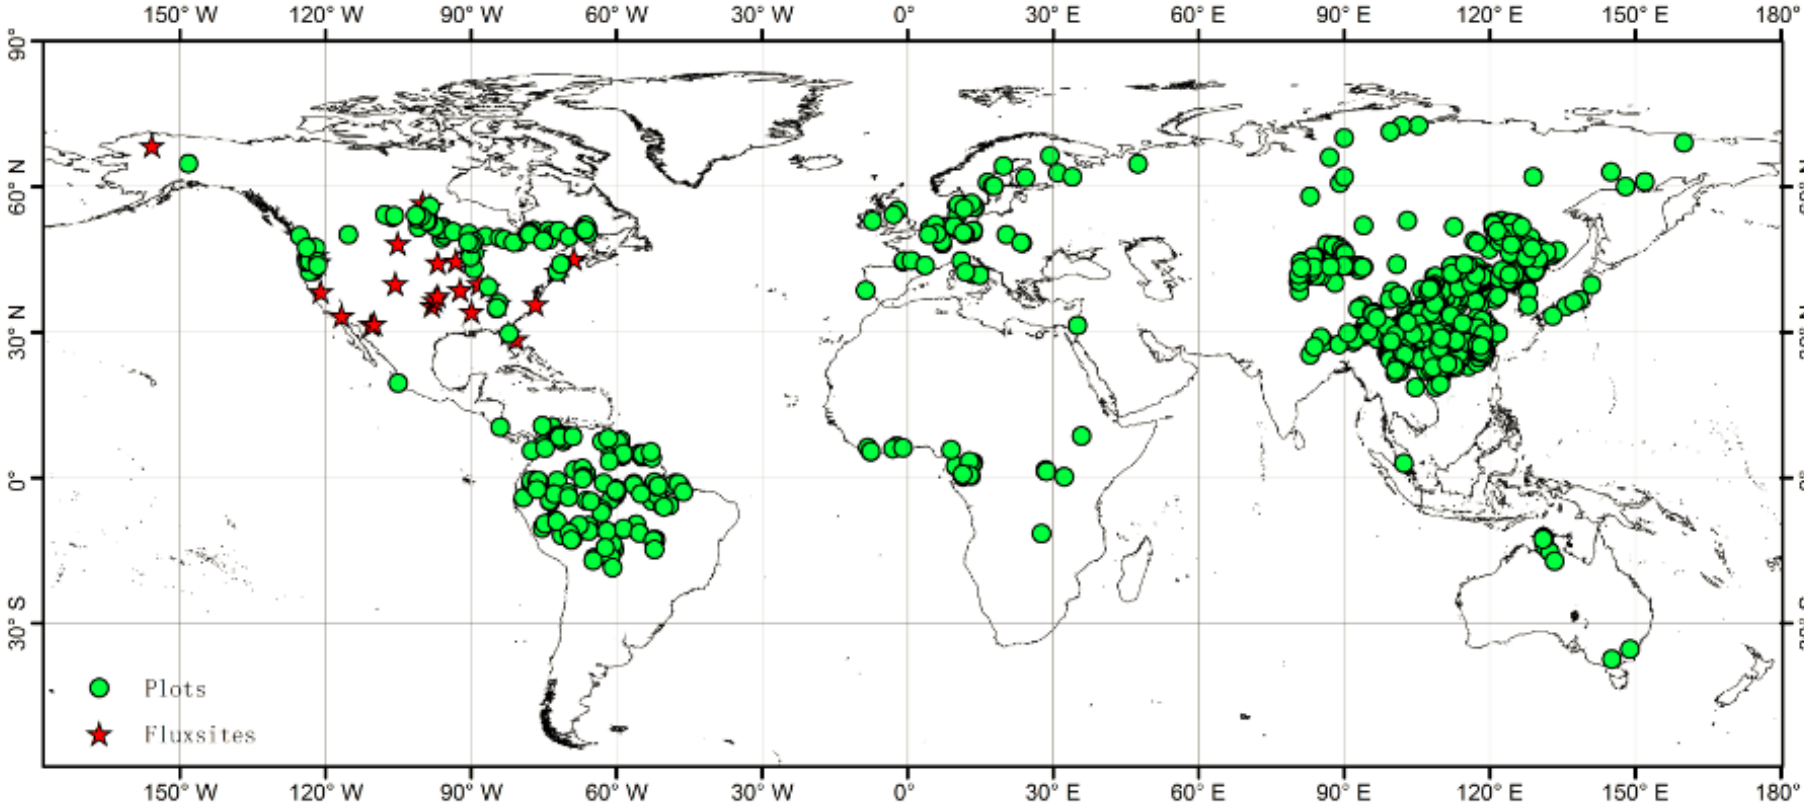

**Table S1** Reference information for flux sites from Fluxnet

| Longitude | Latitude | Site   | PI               | References                         |
|-----------|----------|--------|------------------|------------------------------------|
| 131.15    | -12.49   | Au-How | Jason Beringer   | Beringer <i>et al.</i> (2003)      |
| -68.75    | 45.21    | US-Ho2 | David Hollinger  | Andrew <i>et al.</i> (2005)        |
| -121.56   | 44.45    | US-Me2 | Bev Law          | Van Tuyl <i>et al.</i> (2005)      |
| -121.61   | 44.32    | US-Me3 | Bev Law          | Campbell and Law (2005)            |
| -121.57   | 44.44    | US-Me5 | Bev Law          | Anthoni <i>et al.</i> (2002)       |
| -76.67    | 35.80    | US-NC2 | Asko Noormets    | Domec <i>et al.</i> (2012)         |
| -105.55   | 40.03    | US-NR1 | Peter Blanken    | Monson <i>et al.</i> (2002)        |
| -89.87    | 34.25    | US-Goo | Tilden Meyers    | Wilson and Meyers (2007)           |
| -72.17    | 42.54    | US-Ha1 | William Munger   | Urbanski <i>et al.</i> (2007)      |
| -72.19    | 42.54    | US-LPH | Julian Hadley    | Borken <i>et al.</i> (2006)        |
| -86.41    | 39.32    | US-MMS | Kim Novick       | Oliphant <i>et al.</i> (2004)      |
| -92.20    | 38.74    | US-MOz | Lianhong Gu      | Gu <i>et al.</i> (2006)            |
| -82.24    | 29.76    | US-SP2 | Tim Martin       | Gholz and Clark (2002)             |
| -84.29    | 35.96    | US-WBW | Tilden Meyers    | Hui <i>et al.</i> (2004)           |
| -98.48    | 55.88    | CA-NS1 | Mike Goulden     | Goulden <i>et al.</i> (2006)       |
| -98.52    | 55.91    | CA-NS2 | Mike Goulden     | Wang <i>et al.</i> (2003)          |
| -98.38    | 55.91    | CA-NS3 | Mike Goulden     | Wang <i>et al.</i> (2002)          |
| -98.38    | 55.91    | CA-NS4 | Mike Goulden     | Bond-Lamberty <i>et al.</i> (2003) |
| -98.49    | 55.86    | CA-NS5 | Mike Goulden     | Hirsch <i>et al.</i> (2004)        |
| -99.95    | 56.64    | CA-NS7 | Mike Goulden     | Bond-Lamberty <i>et al.</i> (2003) |
| -121.95   | 45.82    | US-Wrc | Ken Bible        | Harmon <i>et al.</i> (2004)        |
| -89.98    | 46.08    | US-Los | Ankur Desai      | Sulman <i>et al.</i> (2009)        |
| -89.35    | 46.24    | US-Syv | Ankur Desai      | Desai <i>et al.</i> (2005)         |
| -90.08    | 45.81    | US-WCr | Ankur Desai      | Cook <i>et al.</i> (2004)          |
| -110.51   | 31.59    | US-Aud | Tilden Meyers    | Krishnan <i>et al.</i> (2012)      |
| -155.75   | 68.49    | US-Ivo | Donatella Zona   | McEwing <i>et al.</i> (2015)       |
| -80.67    | 28.61    | US-KS2 | Bert Drake       | Stiling <i>et al.</i> (2002)       |
| -116.64   | 33.38    | US-SO4 | Walt Oechel      | Luo <i>et al.</i> (2007)           |
| -120.95   | 38.41    | US-Var | Dennis Baldocchi | Ma <i>et al.</i> (2007)            |
| -98.04    | 35.55    | US-ARb | Margaret Torn    | Migliavacca <i>et al.</i> (2010)   |
| -98.04    | 35.55    | US-ARc | Margaret Torn    | Anderson <i>et al.</i> (2008)      |
| -97.49    | 36.61    | US-ARM | Margaret Torn    | Fischer <i>et al.</i> (2007)       |
| -96.84    | 44.35    | US-Bkg | Tilden Meyers    | Gilmanov <i>et al.</i> (2005)      |
| -88.29    | 40.01    | US-Bo1 | Tilden Meyers    | Turner <i>et al.</i> (2003)        |
| -105.10   | 48.31    | US-FPe | Tilden Meyers    | Gilmanov <i>et al.</i> (2005)      |
| -93.09    | 44.71    | US-Ro1 | John Baker       | Griffis <i>et al.</i> (2010)       |
| -93.09    | 44.72    | US-Ro3 | John Baker       | Griffis <i>et al.</i> (2011)       |
| -109.94   | 31.74    | US-Wkg | Russell Scott    | Scott <i>et al.</i> (2010)         |
| -96.86    | 37.52    | US-Wlr | David Cook       | Song and Wesely (2003)             |

Anderson, M.C., Norman, J.M., Kustas, W.P., Houborg, R., Starks, P.J. & Agam, N. (2008) A thermal-based remote sensing technique for routine mapping of land-surface carbon, water and energy fluxes from field to regional scales. *Remote Sensing of Environment*, **112**, 4227-4241.

Anthoni, P.M., Unsworth, M.H., Law, B.E., Irvine, J., Baldocchi, D.D., Tuyl, S.V. &

- Moore, D. (2002) Seasonal differences in carbon and water vapor exchange in young and old-growth ponderosa pine ecosystems. *Agricultural and Forest Meteorology*, **111**, 203-222.
- Beringer, J., Hutley, L.B., Tapper, N.J., Coutts, A., Kerley, A. & O'Grady, A.P. (2003) Fire impacts on surface heat, moisture and carbon fluxes from a tropical savanna in northern Australia. *International Journal of Wildland Fire*, **12**, 333-340.
- Bond-Lamberty, B., Wang, C. & Gower, S.T. (2004) Net primary production and net ecosystem production of a boreal black spruce wildfire chronosequence. *Global Change Biology*, **10**, 473-487.
- Borken, W., Savage, K., Davidson, E.A. & Trumbore, S.E. (2006) Effects of experimental drought on soil respiration and radiocarbon efflux from a temperate forest soil. *Global Change Biology*, **12**, 177-193.
- Campbell, J.L. & Law, B.E. (2005) Forest soil respiration across three climatically distinct chronosequences in Oregon. *Biogeochemistry*, **73**, 109-125.
- Cook, B.D., Davis, K.J., Wang, W., Desai, A., Berger, B.W., Teclaw, R.M., Martin, J.G., Bolstad, P.V., Bakwin, P.S., Yi, C. & Heilman, W. (2004) Carbon exchange and venting anomalies in an upland deciduous forest in northern Wisconsin, USA. *Agricultural and Forest Meteorology*, **126**, 271-295.
- Desai, A.R., Bolstad, P.V., Cook, B.D., Davis, K.J. & Carey, E.V. (2005) Comparing net ecosystem exchange of carbon dioxide between an old-growth and mature forest in the upper Midwest, USA. *Agricultural and Forest Meteorology*, **128**, 33-55.
- Domec, J.-C., Sun, G., Noormets, A., Gavazzi, M.J., Treasure, E.A., Cohen, E., Swenson, J.J., McNulty, S.G. & King, J.S. (2012) A Comparison of Three Methods to Estimate Evapotranspiration in Two Contrasting Loblolly Pine Plantations: Age-Related Changes in Water Use and Drought Sensitivity of Evapotranspiration Components. *Forest Science*, **58**, 497-512.
- Fischer, M.L., Billesbach, D.P., Berry, J.A., Riley, W.J. & Torn, M.S. (2007) Spatiotemporal Variations in Growing Season Exchanges of CO<sub>2</sub>, H<sub>2</sub>O, and Sensible Heat in Agricultural Fields of the Southern Great Plains. *Earth Interactions*, **11**, 1-21.
- Gholz, H.L. & Clark, K.L. (2002) Energy exchange across a chronosequence of slash pine forests in Florida. *Agricultural and Forest Meteorology*, **112**, 87-102.
- Gilmanov, T.G., Tieszen, L.L., Wylie, B.K., Flanagan, L.B., Frank, A.B., Haferkamp, M.R., Meyers, T.P. & Morgan, J.A. (2005) Integration of CO<sub>2</sub> flux and remotely-sensed data for primary production and ecosystem respiration analyses in the Northern Great Plains: potential for quantitative spatial extrapolation. *Global Ecology and Biogeography*, **14**, 271-292.
- Goulden, M.L., Winston, G.C., McMillan, A.M.S., Litvak, M.E., Read, E.L., Rocha, A.V. & Rob Elliot, J. (2006) An eddy covariance mesonet to measure the effect of forest age on land-atmosphere exchange. *Global Change Biology*, **12**, 2146-2162.
- Griffis, T.J., Baker, J.M., Sargent, S.D., Erickson, M., Corcoran, J., Chen, M. &

- Billmark, K. (2010) Influence of C4 vegetation on  $^{13}\text{C}$  discrimination and isoforcing in the upper Midwest, United States. *Global Biogeochemical Cycles*, **24**, n/a-n/a.
- Griffis, T.J., Lee, X., Baker, J.M., Billmark, K., Schultz, N., Erickson, M., Zhang, X., Fassbinder, J., Xiao, W. & Hu, N. (2011) Oxygen isotope composition of evapotranspiration and its relation to C4 photosynthetic discrimination. *Journal of Geophysical Research: Biogeosciences*, **116**, n/a-n/a.
- Gu, L., Meyers, T., Pallardy, S.G., Hanson, P.J., Yang, B., Heuer, M., Hosman, K.P., Riggs, J.S., Sluss, D. & Wullschlegel, S.D. (2006) Direct and indirect effects of atmospheric conditions and soil moisture on surface energy partitioning revealed by a prolonged drought at a temperate forest site. *Journal of Geophysical Research: Atmospheres*, **111**, n/a-n/a.
- Harmon, M.E., Bible, K., Ryan, M.G., Shaw, D.C., Chen, H., Klopatek, J. & Li, X. (2004) Production, Respiration, and Overall Carbon Balance in an Old-growth Pseudotsuga-Tsuga Forest Ecosystem. *Ecosystems*, **7**, 498-512.
- Hirsch, A.I., Trumbore, S.E. & Goulden, M.L. (2004) The surface  $\text{CO}_2$  gradient and pore-space storage flux in a high-porosity litter layer. *Tellus B*, **56**, 312-321.
- Hui, D., Wan, S., Su, B., Katul, G., Monson, R. & Luo, Y. (2004) Gap-filling missing data in eddy covariance measurements using multiple imputation (MI) for annual estimations. *Agricultural and Forest Meteorology*, **121**, 93-111.
- Krishnan, P., Meyers, T.P., Scott, R.L., Kennedy, L. & Heuer, M. (2012) Energy exchange and evapotranspiration over two temperate semi-arid grasslands in North America. *Agricultural and Forest Meteorology*, **153**, 31-44.
- Luo, H., Oechel, W.C., Hastings, S.J., Zulueta, R., Qian, Y. & Kwon, H. (2007) Mature semiarid chaparral ecosystems can be a significant sink for atmospheric carbon dioxide. *Global Change Biology*, **13**, 386-396.
- Ma, S., Baldocchi, D.D., Xu, L. & Hehn, T. (2007) Inter-annual variability in carbon dioxide exchange of an oak/grass savanna and open grassland in California. *Agricultural and Forest Meteorology*, **147**, 157-171.
- McEwing, K.R., Fisher, J.P. & Zona, D. (2015) Environmental and vegetation controls on the spatial variability of  $\text{CH}_4$  emission from wet-sedge and tussock tundra ecosystems in the Arctic. *Plant and Soil*, **388**, 37-52.
- Migliavacca, M., Reichstein, M., Richardson, A.D., Colombo, R., Sutton, M.A., Lasslop, G., Tomelleri, E., Wohlfahrt, G., Carvalhais, N., Cescatti, A., Mahecha, M.D., Montagnani, L., Papale, D., Zaehle, S., Arain, A., Arneth, A., Black, T.A., Carrara, A., Dore, S., Gianelle, D., Helfter, C., Hollinger, D., Kutsch, W.L., Lafleur, P.M., Nouvellon, Y., Rebmann, C., Da Rocha, H.R., Rodeghiero, M., Rouspard, O., Sebasti , M.-T., Seufert, G., Soussana, J.-F. & Van Der Molen, M.K. (2011) Semiempirical modeling of abiotic and biotic factors controlling ecosystem respiration across eddy covariance sites. *Global Change Biology*, **17**, 390-409.
- Monson, R.K., Turnipseed, A.A., Sparks, J.P., Harley, P.C., Scott-Denton, L.E., Sparks, K. & Huxman, T.E. (2002) Carbon sequestration in a high-elevation, subalpine forest. *Global Change Biology*, **8**, 459-478.

- Oliphant, A.J., Grimmond, C.S.B., Zutter, H.N., Schmid, H.P., Su, H.B., Scott, S.L., Offerle, B., Randolph, J.C. & Ehman, J. (2004) Heat storage and energy balance fluxes for a temperate deciduous forest. *Agricultural and Forest Meteorology*, **126**, 185-201.
- Richardson, A.D. & Hollinger, D.Y. (2005) Statistical modeling of ecosystem respiration using eddy covariance data: Maximum likelihood parameter estimation, and Monte Carlo simulation of model and parameter uncertainty, applied to three simple models. *Agricultural and Forest Meteorology*, **131**, 191-208.
- Scott, R.L., Hamerlynck, E.P., Jenerette, G.D., Moran, M.S. & Barron-Gafford, G.A. (2010) Carbon dioxide exchange in a semidesert grassland through drought-induced vegetation change. *Journal of Geophysical Research: Biogeosciences*, **115**, n/a-n/a.
- Song, J. & Wesely, M.L. (2003) On comparison of modeled surface flux variations to aircraft observations. *Agricultural and Forest Meteorology*, **117**, 159-171.
- Stiling, P., Cattell, M., Moon, D.C., Rossi, A., Hungate, B.A., Hymus, G. & Drake, B. (2002) Elevated atmospheric CO<sub>2</sub> lowers herbivore abundance, but increases leaf abscission rates. *Global Change Biology*, **8**, 658-667.
- Sulman, B.N., Desai, A.R., Cook, B.D., Saliendra, N. & Mackay, D.S. (2009) Contrasting carbon dioxide fluxes between a drying shrub wetland in Northern Wisconsin, USA, and nearby forests. *Biogeosciences*, **6**, 1115-1126.
- Turner, D.P., Urbanski, S., Bremer, D., Wofsy, S.C., Meyers, T., Gower, S.T. & Gregory, M. (2003) A cross-biome comparison of daily light use efficiency for gross primary production. *Global Change Biology*, **9**, 383-395.
- Urbanski, S., Barford, C., Wofsy, S., Kucharik, C., Pyle, E., Budney, J., McKain, K., Fitzjarrald, D., Czikowsky, M. & Munger, J.W. (2007) Factors controlling CO<sub>2</sub> exchange on timescales from hourly to decadal at Harvard Forest. *Journal of Geophysical Research-Biogeosciences*, **112**
- Van Tuyl, S., Law, B.E., Turner, D.P. & Gitelman, A.I. (2005) Variability in net primary production and carbon storage in biomass across Oregon forests—an assessment integrating data from forest inventories, intensive sites, and remote sensing. *Forest Ecology and Management*, **209**, 273-291.
- Wang, C., Bond-Lamberty, B. & Gower, S.T. (2002) Environmental controls on carbon dioxide flux from black spruce coarse woody debris. *Oecologia*, **132**, 374-381.
- Wang, C., Bond-Lamberty, B.E.N. & Gower, S.T. (2003) Carbon distribution of a well- and poorly-drained black spruce fire chronosequence. *Global Change Biology*, **9**, 1066-1079.
- Wilson, T.B. & Meyers, T.P. (2007) Determining vegetation indices from solar and photosynthetically active radiation fluxes. *Agricultural and Forest Meteorology*, **144**, 160-179.
