# Supplementary material for: Evaluation of modeled global carbon dynamics: analysis based on global carbon flux and above-ground biomass data
Source: Copernicus journal article supplement (doi:10.5194/bg-2016-142), 2016-04-25
Supplement: Supplementary file [file Supplementary.pdf › Response_MS/Supplementary.pdf]

**Fig. S1** Location of plots and flux sits for model calibration and validation

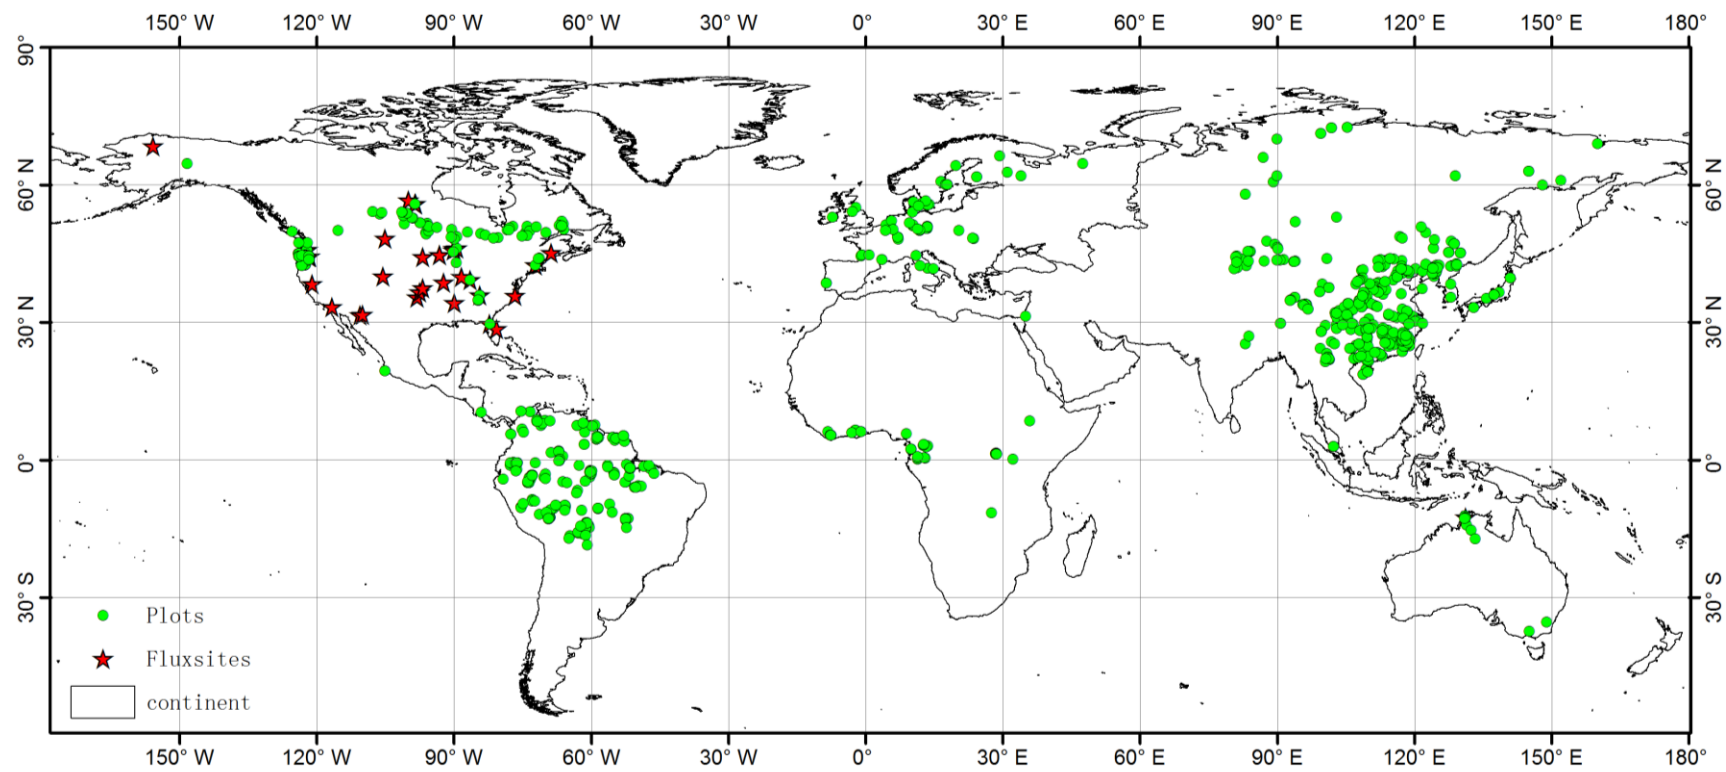

**Table S1** Reference information for flux sites from Fluxnet

| Longitude | Latitude | Site   | PI               | References                         |
|-----------|----------|--------|------------------|------------------------------------|
| 131.15    | -12.49   | Au-How | Jason Beringer   | Beringer <i>et al.</i> (2003)      |
| -68.75    | 45.21    | US-Ho2 | David Hollinger  | Andrew <i>et al.</i> (2005)        |
| -121.56   | 44.45    | US-Me2 | Bev Law          | Van Tuyl <i>et al.</i> (2005)      |
| -121.61   | 44.32    | US-Me3 | Bev Law          | Campbell and Law (2005)            |
| -121.57   | 44.44    | US-Me5 | Bev Law          | Anthoni <i>et al.</i> (2002)       |
| -76.67    | 35.80    | US-NC2 | Asko Noormets    | Domec <i>et al.</i> (2012)         |
| -105.55   | 40.03    | US-NR1 | Peter Blanken    | Monson <i>et al.</i> (2002)        |
| -89.87    | 34.25    | US-Goo | Tilden Meyers    | Wilson and Meyers (2007)           |
| -72.17    | 42.54    | US-Ha1 | William Munger   | Urbanski <i>et al.</i> (2007)      |
| -72.19    | 42.54    | US-LPH | Julian Hadley    | Borken <i>et al.</i> (2006)        |
| -86.41    | 39.32    | US-MMS | Kim Novick       | Oliphant <i>et al.</i> (2004)      |
| -92.20    | 38.74    | US-MOz | Lianhong Gu      | Gu <i>et al.</i> (2006)            |
| -82.24    | 29.76    | US-SP2 | Tim Martin       | Gholz and Clark (2002)             |
| -84.29    | 35.96    | US-WBW | Tilden Meyers    | Hui <i>et al.</i> (2004)           |
| -98.48    | 55.88    | CA-NS1 | Mike Goulden     | Goulden <i>et al.</i> (2006)       |
| -98.52    | 55.91    | CA-NS2 | Mike Goulden     | Wang <i>et al.</i> (2003)          |
| -98.38    | 55.91    | CA-NS3 | Mike Goulden     | Wang <i>et al.</i> (2002)          |
| -98.38    | 55.91    | CA-NS4 | Mike Goulden     | Bond-Lamberty <i>et al.</i> (2003) |
| -98.49    | 55.86    | CA-NS5 | Mike Goulden     | Hirsch <i>et al.</i> (2004)        |
| -99.95    | 56.64    | CA-NS7 | Mike Goulden     | Bond-Lamberty <i>et al.</i> (2003) |
| -121.95   | 45.82    | US-Wrc | Ken Bible        | Harmon <i>et al.</i> (2004)        |
| -89.98    | 46.08    | US-Los | Ankur Desai      | Sulman <i>et al.</i> (2009)        |
| -89.35    | 46.24    | US-Syv | Ankur Desai      | Desai <i>et al.</i> (2005)         |
| -90.08    | 45.81    | US-WCr | Ankur Desai      | Cook <i>et al.</i> (2004)          |
| -110.51   | 31.59    | US-Aud | Tilden Meyers    | Krishnan <i>et al.</i> (2012)      |
| -155.75   | 68.49    | US-Ivo | Donatella Zona   | McEwing <i>et al.</i> (2015)       |
| -80.67    | 28.61    | US-KS2 | Bert Drake       | Stiling <i>et al.</i> (2002)       |
| -116.64   | 33.38    | US-SO4 | Walt Oechel      | Luo <i>et al.</i> (2007)           |
| -120.95   | 38.41    | US-Var | Dennis Baldocchi | Ma <i>et al.</i> (2007)            |
| -98.04    | 35.55    | US-ARb | Margaret Torn    | Migliavacca <i>et al.</i> (2010)   |
| -98.04    | 35.55    | US-ARc | Margaret Torn    | Anderson <i>et al.</i> (2008)      |
| -97.49    | 36.61    | US-ARM | Margaret Torn    | Fischer <i>et al.</i> (2007)       |
| -96.84    | 44.35    | US-Bkg | Tilden Meyers    | Gilmanov <i>et al.</i> (2005)      |
| -88.29    | 40.01    | US-Bo1 | Tilden Meyers    | Turner <i>et al.</i> (2003)        |
| -105.10   | 48.31    | US-FPe | Tilden Meyers    | Gilmanov <i>et al.</i> (2005)      |
| -93.09    | 44.71    | US-Ro1 | John Baker       | Griffis <i>et al.</i> (2010)       |
| -93.09    | 44.72    | US-Ro3 | John Baker       | Griffis <i>et al.</i> (2011)       |
| -109.94   | 31.74    | US-Wkg | Russell Scott    | Scott <i>et al.</i> (2010)         |
| -96.86    | 37.52    | US-Wlr | David Cook       | Song and Wesely (2003)             |

Anderson, M.C., Norman, J.M., Kustas, W.P., Houborg, R., Starks, P.J. & Agam, N. (2008) A thermal-based remote sensing technique for routine mapping of land-surface carbon, water and energy fluxes from field to regional scales.

*Remote Sensing of Environment*, **112**, 4227-4241.

Anthoni, P.M., Unsworth, M.H., Law, B.E., Irvine, J., Baldocchi, D.D., Tuyl, S.V. &

- Moore, D. (2002) Seasonal differences in carbon and water vapor exchange in young and old-growth ponderosa pine ecosystems. *Agricultural and Forest Meteorology*, **111**, 203-222.
- Beringer, J., Hutley, L.B., Tapper, N.J., Coutts, A., Kerley, A. & O'Grady, A.P. (2003) Fire impacts on surface heat, moisture and carbon fluxes from a tropical savanna in northern Australia. *International Journal of Wildland Fire*, **12**, 333-340.
- Bond-Lamberty, B., Wang, C. & Gower, S.T. (2004) Net primary production and net ecosystem production of a boreal black spruce wildfire chronosequence. *Global Change Biology*, **10**, 473-487.
- Borken, W., Savage, K., Davidson, E.A. & Trumbore, S.E. (2006) Effects of experimental drought on soil respiration and radiocarbon efflux from a temperate forest soil. *Global Change Biology*, **12**, 177-193.
- Campbell, J.L. & Law, B.E. (2005) Forest soil respiration across three climatically distinct chronosequences in Oregon. *Biogeochemistry*, **73**, 109-125.
- Cook, B.D., Davis, K.J., Wang, W., Desai, A., Berger, B.W., Teclaw, R.M., Martin, J.G., Bolstad, P.V., Bakwin, P.S., Yi, C. & Heilman, W. (2004) Carbon exchange and venting anomalies in an upland deciduous forest in northern Wisconsin, USA. *Agricultural and Forest Meteorology*, **126**, 271-295.
- Desai, A.R., Bolstad, P.V., Cook, B.D., Davis, K.J. & Carey, E.V. (2005) Comparing net ecosystem exchange of carbon dioxide between an old-growth and mature forest in the upper Midwest, USA. *Agricultural and Forest Meteorology*, **128**, 33-55.
- Domec, J.-C., Sun, G., Noormets, A., Gavazzi, M.J., Treasure, E.A., Cohen, E., Swenson, J.J., McNulty, S.G. & King, J.S. (2012) A Comparison of Three Methods to Estimate Evapotranspiration in Two Contrasting Loblolly Pine Plantations: Age-Related Changes in Water Use and Drought Sensitivity of Evapotranspiration Components. *Forest Science*, **58**, 497-512.
- Fischer, M.L., Billesbach, D.P., Berry, J.A., Riley, W.J. & Torn, M.S. (2007) Spatiotemporal Variations in Growing Season Exchanges of CO<sub>2</sub>, H<sub>2</sub>O, and Sensible Heat in Agricultural Fields of the Southern Great Plains. *Earth Interactions*, **11**, 1-21.
- Gholz, H.L. & Clark, K.L. (2002) Energy exchange across a chronosequence of slash pine forests in Florida. *Agricultural and Forest Meteorology*, **112**, 87-102.
- Gilmanov, T.G., Tieszen, L.L., Wylie, B.K., Flanagan, L.B., Frank, A.B., Haferkamp, M.R., Meyers, T.P. & Morgan, J.A. (2005) Integration of CO<sub>2</sub> flux and remotely-sensed data for primary production and ecosystem respiration analyses in the Northern Great Plains: potential for quantitative spatial extrapolation. *Global Ecology and Biogeography*, **14**, 271-292.
- Goulden, M.L., Winston, G.C., McMillan, A.M.S., Litvak, M.E., Read, E.L., Rocha, A.V. & Rob Elliot, J. (2006) An eddy covariance mesonet to measure the effect of forest age on land-atmosphere exchange. *Global Change Biology*, **12**, 2146-2162.
- Griffis, T.J., Baker, J.M., Sargent, S.D., Erickson, M., Corcoran, J., Chen, M. &

- Billmark, K. (2010) Influence of C4 vegetation on  $^{13}\text{CO}_2$  discrimination and isoforcing in the upper Midwest, United States. *Global Biogeochemical Cycles*, **24**, n/a-n/a.
- Griffis, T.J., Lee, X., Baker, J.M., Billmark, K., Schultz, N., Erickson, M., Zhang, X., Fassbinder, J., Xiao, W. & Hu, N. (2011) Oxygen isotope composition of evapotranspiration and its relation to C4 photosynthetic discrimination. *Journal of Geophysical Research: Biogeosciences*, **116**, n/a-n/a.
- Gu, L., Meyers, T., Pallardy, S.G., Hanson, P.J., Yang, B., Heuer, M., Hosman, K.P., Riggs, J.S., Sluss, D. & Wullschlegel, S.D. (2006) Direct and indirect effects of atmospheric conditions and soil moisture on surface energy partitioning revealed by a prolonged drought at a temperate forest site. *Journal of Geophysical Research: Atmospheres*, **111**, n/a-n/a.
- Harmon, M.E., Bible, K., Ryan, M.G., Shaw, D.C., Chen, H., Klopatek, J. & Li, X. (2004) Production, Respiration, and Overall Carbon Balance in an Old-growth Pseudotsuga-Tsuga Forest Ecosystem. *Ecosystems*, **7**, 498-512.
- Hirsch, A.I., Trumbore, S.E. & Goulden, M.L. (2004) The surface  $\text{CO}_2$  gradient and pore-space storage flux in a high-porosity litter layer. *Tellus B*, **56**, 312-321.
- Hui, D., Wan, S., Su, B., Katul, G., Monson, R. & Luo, Y. (2004) Gap-filling missing data in eddy covariance measurements using multiple imputation (MI) for annual estimations. *Agricultural and Forest Meteorology*, **121**, 93-111.
- Krishnan, P., Meyers, T.P., Scott, R.L., Kennedy, L. & Heuer, M. (2012) Energy exchange and evapotranspiration over two temperate semi-arid grasslands in North America. *Agricultural and Forest Meteorology*, **153**, 31-44.
- Luo, H., Oechel, W.C., Hastings, S.J., Zulueta, R., Qian, Y. & Kwon, H. (2007) Mature semiarid chaparral ecosystems can be a significant sink for atmospheric carbon dioxide. *Global Change Biology*, **13**, 386-396.
- Ma, S., Baldocchi, D.D., Xu, L. & Hehn, T. (2007) Inter-annual variability in carbon dioxide exchange of an oak/grass savanna and open grassland in California. *Agricultural and Forest Meteorology*, **147**, 157-171.
- McEwing, K.R., Fisher, J.P. & Zona, D. (2015) Environmental and vegetation controls on the spatial variability of  $\text{CH}_4$  emission from wet-sedge and tussock tundra ecosystems in the Arctic. *Plant and Soil*, **388**, 37-52.
- Migliavacca, M., Reichstein, M., Richardson, A.D., Colombo, R., Sutton, M.A., Lasslop, G., Tomelleri, E., Wohlfahrt, G., Carvalhais, N., Cescatti, A., Mahecha, M.D., Montagnani, L., Papale, D., Zaehle, S., Arain, A., Arneth, A., Black, T.A., Carrara, A., Dore, S., Gianelle, D., Helfter, C., Hollinger, D., Kutsch, W.L., Lafleur, P.M., Nouvellon, Y., Rebmann, C., Da Rocha, H.R., Rodeghiero, M., Rouspard, O., Sebasti  , M.-T., Seufert, G., Soussana, J.-F. & Van Der Molen, M.K. (2011) Semiempirical modeling of abiotic and biotic factors controlling ecosystem respiration across eddy covariance sites. *Global Change Biology*, **17**, 390-409.
- Monson, R.K., Turnipseed, A.A., Sparks, J.P., Harley, P.C., Scott-Denton, L.E., Sparks, K. & Huxman, T.E. (2002) Carbon sequestration in a high-elevation, subalpine forest. *Global Change Biology*, **8**, 459-478.

- Oliphant, A.J., Grimmond, C.S.B., Zutter, H.N., Schmid, H.P., Su, H.B., Scott, S.L., Offerle, B., Randolph, J.C. & Ehman, J. (2004) Heat storage and energy balance fluxes for a temperate deciduous forest. *Agricultural and Forest Meteorology*, **126**, 185-201.
- Richardson, A.D. & Hollinger, D.Y. (2005) Statistical modeling of ecosystem respiration using eddy covariance data: Maximum likelihood parameter estimation, and Monte Carlo simulation of model and parameter uncertainty, applied to three simple models. *Agricultural and Forest Meteorology*, **131**, 191-208.
- Scott, R.L., Hamerlynck, E.P., Jenerette, G.D., Moran, M.S. & Barron-Gafford, G.A. (2010) Carbon dioxide exchange in a semidesert grassland through drought-induced vegetation change. *Journal of Geophysical Research: Biogeosciences*, **115**, n/a-n/a.
- Song, J. & Wesely, M.L. (2003) On comparison of modeled surface flux variations to aircraft observations. *Agricultural and Forest Meteorology*, **117**, 159-171.
- Stiling, P., Cattell, M., Moon, D.C., Rossi, A., Hungate, B.A., Hymus, G. & Drake, B. (2002) Elevated atmospheric CO<sub>2</sub> lowers herbivore abundance, but increases leaf abscission rates. *Global Change Biology*, **8**, 658-667.
- Sulman, B.N., Desai, A.R., Cook, B.D., Saliendra, N. & Mackay, D.S. (2009) Contrasting carbon dioxide fluxes between a drying shrub wetland in Northern Wisconsin, USA, and nearby forests. *Biogeosciences*, **6**, 1115-1126.
- Turner, D.P., Urbanski, S., Bremer, D., Wofsy, S.C., Meyers, T., Gower, S.T. & Gregory, M. (2003) A cross-biome comparison of daily light use efficiency for gross primary production. *Global Change Biology*, **9**, 383-395.
- Urbanski, S., Barford, C., Wofsy, S., Kucharik, C., Pyle, E., Budney, J., McKain, K., Fitzjarrald, D., Czikowsky, M. & Munger, J.W. (2007) Factors controlling CO<sub>2</sub> exchange on timescales from hourly to decadal at Harvard Forest. *Journal of Geophysical Research-Biogeosciences*, **112**
- Van Tuyl, S., Law, B.E., Turner, D.P. & Gitelman, A.I. (2005) Variability in net primary production and carbon storage in biomass across Oregon forests—an assessment integrating data from forest inventories, intensive sites, and remote sensing. *Forest Ecology and Management*, **209**, 273-291.
- Wang, C., Bond-Lamberty, B. & Gower, S.T. (2002) Environmental controls on carbon dioxide flux from black spruce coarse woody debris. *Oecologia*, **132**, 374-381.
- Wang, C., Bond-Lamberty, B.E.N. & Gower, S.T. (2003) Carbon distribution of a well- and poorly-drained black spruce fire chronosequence. *Global Change Biology*, **9**, 1066-1079.
- Wilson, T.B. & Meyers, T.P. (2007) Determining vegetation indices from solar and photosynthetically active radiation fluxes. *Agricultural and Forest Meteorology*, **144**, 160-179.

Table S2 Collected forest plots for model calibration

| ID | Year | AGB (Mg ha <sup>-1</sup> DM) |
|----|------|------------------------------|
| 1  | 1994 | 284.8                        |
| 2  | 2000 | 149.1                        |
| 3  | 1998 | 255.8                        |
| 4  | 2001 | 93.0                         |
| 5  | 1998 | 177.9                        |
| 6  | 2007 | 82.5                         |
| 7  | 1986 | 195.4                        |
| 8  | 2007 | 186.3                        |
| 9  | 1994 | 61.8                         |
| 10 | 1978 | 80.4                         |
| 11 | 1996 | 121.0                        |
| 12 | 1996 | 152.7                        |
| 13 | 1991 | 187.6                        |
| 14 | 1984 | 108.3                        |
| 15 | 1992 | 230.5                        |
| 16 | 1996 | 159.7                        |
| 17 | 1997 | 111.5                        |
| 18 | 1989 | 114.8                        |
| 19 | 1992 | 57.5                         |
| 20 | 1987 | 25.2                         |
| 21 | 2006 | 52.3                         |
| 22 | 1997 | 39.7                         |
| 23 | 1997 | 45.0                         |
| 24 | 1999 | 41.9                         |
| 25 | 1991 | 153.9                        |
| 26 | 1992 | 91.7                         |
| 27 | 2002 | 66.7                         |
| 28 | 2007 | 56.4                         |
| 29 | 1983 | 134.8                        |
| 30 | 1996 | 146.7                        |
| 31 | 2001 | 178.5                        |
| 32 | 1999 | 155.7                        |
| 33 | 2005 | 96.6                         |
| 34 | 1999 | 78.8                         |
| 35 | 1999 | 53.8                         |
| 36 | 1999 | 78.5                         |
| 37 | 1992 | 265.1                        |
| 38 | 1989 | 84.1                         |
| 39 | 1999 | 83.9                         |
| 40 | 1999 | 161.8                        |
| 41 | 1999 | 42.8                         |

|    |      |       |
|----|------|-------|
| 42 | 1999 | 60.2  |
| 43 | 1999 | 66.4  |
| 44 | 1995 | 154.0 |
| 45 | 1980 | 117.8 |
| 46 | 1988 | 114.3 |
| 47 | 1989 | 122.5 |
| 48 | 1987 | 41.8  |
| 49 | 1994 | 69.6  |
| 50 | 1982 | 126.4 |
| 51 | 1988 | 97.8  |
| 52 | 1990 | 138.2 |
| 53 | 1979 | 54.0  |
| 54 | 1982 | 33.0  |
| 55 | 1984 | 44.1  |
| 56 | 1987 | 45.1  |
| 57 | 1997 | 65.1  |
| 58 | 2006 | 60.9  |
| 59 | 2005 | 89.9  |
| 60 | 1986 | 63.0  |
| 61 | 2007 | 50.3  |
| 62 | 2004 | 96.3  |
| 63 | 2005 | 75.3  |
| 64 | 2006 | 70.2  |
| 65 | 1997 | 70.9  |
| 66 | 1985 | 31.3  |
| 67 | 1984 | 173.2 |
| 68 | 1984 | 57.9  |
| 69 | 1984 | 142.1 |
| 70 | 1984 | 38.2  |
| 71 | 1984 | 92.7  |
| 72 | 1984 | 38.2  |
| 73 | 1992 | 30.3  |
| 74 | 1999 | 65.9  |
| 75 | 1999 | 25.6  |
| 76 | 1981 | 53.4  |
| 77 | 1984 | 65.0  |
| 78 | 1991 | 97.5  |
| 79 | 1980 | 63.0  |
| 80 | 2006 | 40.8  |
| 81 | 1980 | 17.2  |
| 82 | 1984 | 48.1  |
| 83 | 2000 | 47.0  |
| 84 | 1984 | 54.5  |
| 85 | 1984 | 60.0  |

|     |      |       |
|-----|------|-------|
| 86  | 1984 | 85.0  |
| 87  | 1996 | 48.1  |
| 88  | 1984 | 76.6  |
| 89  | 1984 | 12.6  |
| 90  | 1984 | 145.3 |
| 91  | 1984 | 71.0  |
| 92  | 1991 | 56.5  |
| 93  | 1984 | 58.6  |
| 94  | 2000 | 54.2  |
| 95  | 1984 | 182.5 |
| 96  | 1987 | 37.0  |
| 97  | 1997 | 49.8  |
| 98  | 1999 | 49.7  |
| 99  | 2006 | 25.3  |
| 100 | 1984 | 67.9  |
| 101 | 1987 | 123.1 |
| 102 | 1987 | 60.3  |
| 103 | 2007 | 74.1  |
| 104 | 1994 | 65.3  |
| 105 | 1995 | 89.0  |
| 106 | 1997 | 67.9  |
| 107 | 1997 | 66.9  |
| 108 | 2006 | 53.3  |
| 109 | 1994 | 209.9 |
| 110 | 1993 | 49.7  |
| 111 | 2003 | 69.9  |
| 112 | 2006 | 61.6  |
| 113 | 1984 | 68.8  |
| 114 | 1996 | 72.0  |
| 115 | 2006 | 98.7  |
| 116 | 1984 | 40.8  |
| 117 | 1987 | 47.0  |
| 118 | 1997 | 55.3  |
| 119 | 1995 | 65.1  |
| 120 | 1973 | 119.5 |
| 121 | 1990 | 48.8  |
| 122 | 2004 | 97.3  |
| 123 | 1984 | 116.4 |
| 124 | 1995 | 112.3 |
| 125 | 1996 | 214.5 |
| 126 | 2004 | 51.3  |
| 127 | 2005 | 322.1 |
| 128 | 2005 | 81.0  |
| 129 | 1996 | 197.4 |



|     |      |       |
|-----|------|-------|
| 130 | 1993 | 105.2 |
| 131 | 1996 | 188.2 |
| 132 | 1999 | 163.4 |
| 133 | 2003 | 152.5 |
| 134 | 2005 | 134.0 |
| 135 | 2002 | 84.1  |
| 136 | 1983 | 119.6 |
| 137 | 1997 | 74.7  |
| 138 | 2003 | 101.3 |
| 139 | 1983 | 70.2  |
| 140 | 1995 | 139.8 |
| 141 | 1983 | 73.9  |
| 142 | 1988 | 101.4 |
| 143 | 1989 | 111.6 |
| 144 | 1980 | 52.6  |
| 145 | 1983 | 82.6  |
| 146 | 2005 | 64.8  |
| 147 | 1976 | 70.3  |
| 148 | 1992 | 126.0 |
| 149 | 1997 | 95.0  |
| 150 | 1999 | 63.6  |
| 151 | 2001 | 110.3 |
| 152 | 1997 | 92.7  |
| 153 | 1999 | 143.9 |
| 154 | 1995 | 46.1  |
| 155 | 1973 | 121.3 |
| 156 | 1988 | 222.6 |
| 157 | 1990 | 81.3  |
| 158 | 1987 | 81.6  |
| 159 | 2005 | 67.0  |
| 160 | 1980 | 87.5  |
| 161 | 1992 | 60.4  |
| 162 | 1977 | 198.7 |
| 163 | 2003 | 83.6  |
| 164 | 2004 | 123.6 |
| 165 | 1974 | 53.4  |
| 166 | 1986 | 130.1 |
| 167 | 2002 | 95.1  |
| 168 | 1983 | 174.3 |
| 169 | 2003 | 72.1  |
| 170 | 2005 | 82.6  |
| 171 | 2006 | 125.0 |
| 172 | 1991 | 127.9 |
| 173 | 1989 | 93.3  |

|     |      |       |
|-----|------|-------|
| 174 | 1983 | 191.0 |
| 175 | 1995 | 128.9 |
| 176 | 1985 | 93.1  |
| 177 | 1990 | 115.0 |
| 178 | 2000 | 67.5  |
| 179 | 1986 | 61.0  |
| 180 | 2003 | 75.2  |
| 181 | 1991 | 64.5  |
| 182 | 2005 | 82.4  |
| 183 | 2006 | 77.7  |
| 184 | 1977 | 160.5 |
| 185 | 1983 | 54.7  |
| 186 | 2005 | 42.5  |
| 187 | 2006 | 51.8  |
| 188 | 1993 | 99.1  |
| 189 | 1983 | 41.7  |
| 190 | 1994 | 55.2  |
| 191 | 2005 | 48.8  |
| 192 | 1989 | 197.5 |
| 193 | 1991 | 49.2  |
| 194 | 2003 | 45.5  |
| 195 | 1991 | 54.4  |
| 196 | 2005 | 98.6  |
| 197 | 1992 | 207.5 |
| 198 | 2003 | 61.2  |
| 199 | 2002 | 72.0  |
| 200 | 1995 | 60.1  |
| 201 | 1996 | 167.3 |
| 202 | 2005 | 81.6  |
| 203 | 1996 | 91.9  |
| 204 | 2005 | 50.8  |
| 205 | 2005 | 84.0  |
| 206 | 2007 | 45.3  |
| 207 | 1991 | 118.6 |
| 208 | 1992 | 189.3 |
| 209 | 1997 | 218.2 |
| 210 | 1989 | 80.6  |
| 211 | 1991 | 116.4 |
| 212 | 1985 | 167.0 |
| 213 | 1994 | 198.5 |
| 214 | 1998 | 237.3 |
| 215 | 1985 | 89.9  |
| 216 | 1992 | 343.8 |
| 217 | 2003 | 49.8  |

|     |      |       |
|-----|------|-------|
| 218 | 2004 | 209.3 |
| 219 | 1994 | 194.5 |
| 220 | 2000 | 59.6  |
| 221 | 2005 | 101.5 |
| 222 | 1990 | 88.1  |
| 223 | 2003 | 135.7 |
| 224 | 2002 | 151.9 |
| 225 | 2003 | 55.9  |
| 226 | 2004 | 298.3 |
| 227 | 1996 | 265.7 |
| 228 | 1998 | 39.5  |
| 229 | 2004 | 83.6  |
| 230 | 1996 | 47.3  |
| 231 | 1998 | 79.1  |
| 232 | 2002 | 46.2  |
| 233 | 2006 | 58.5  |
| 234 | 2006 | 54.5  |
| 235 | 2007 | 71.8  |
| 236 | 1998 | 61.0  |
| 237 | 2000 | 124.3 |
| 238 | 2000 | 66.1  |
| 239 | 2004 | 110.5 |
| 240 | 1995 | 131.6 |
| 241 | 2002 | 125.7 |
| 242 | 1995 | 272.1 |
| 243 | 1988 | 155.6 |
| 244 | 2005 | 136.3 |
| 245 | 1993 | 151.0 |
| 246 | 1995 | 110.1 |
| 247 | 2002 | 139.8 |
| 248 | 1992 | 72.9  |
| 249 | 1993 | 45.5  |
| 250 | 2005 | 100.8 |
| 251 | 1984 | 62.0  |
| 252 | 1983 | 150.9 |
| 253 | 2002 | 37.3  |
| 254 | 1988 | 89.6  |
| 255 | 1989 | 137.1 |
| 256 | 1996 | 196.9 |
| 257 | 2004 | 194.2 |
| 258 | 1994 | 268.2 |
| 259 | 1994 | 242.3 |
| 260 | 2004 | 129.6 |
| 261 | 1992 | 89.9  |

|     |      |       |
|-----|------|-------|
| 262 | 2005 | 249.4 |
| 263 | 2002 | 69.3  |
| 264 | 1994 | 105.3 |
| 265 | 1985 | 47.2  |
| 266 | 2002 | 77.5  |
| 267 | 2003 | 59.9  |
| 268 | 1996 | 165.4 |
| 269 | 1990 | 80.4  |
| 270 | 1993 | 284.5 |
| 271 | 2002 | 69.4  |
| 272 | 1990 | 89.2  |
| 273 | 1993 | 168.0 |
| 274 | 1993 | 129.3 |
| 275 | 1988 | 185.4 |
| 276 | 1992 | 453.1 |
| 277 | 1989 | 516.3 |
| 278 | 1991 | 481.4 |
| 279 | 1990 | 54.4  |
| 280 | 1991 | 324.2 |
| 281 | 2000 | 535.8 |
| 282 | 2003 | 42.5  |
| 283 | 2004 | 325.0 |
| 284 | 2006 | 241.7 |
| 285 | 2002 | 249.9 |
| 286 | 2002 | 248.2 |
| 287 | 1997 | 259.1 |
| 288 | 1981 | 41.8  |
| 289 | 1982 | 42.7  |
| 290 | 1983 | 38.9  |
| 291 | 1981 | 57.0  |
| 292 | 1988 | 90.5  |
| 293 | 1985 | 99.3  |
| 294 | 1999 | 142.8 |
| 295 | 2001 | 59.7  |
| 296 | 1996 | 242.4 |
| 297 | 1991 | 69.9  |
| 298 | 1987 | 274.6 |
| 299 | 1990 | 58.1  |
| 300 | 2001 | 63.0  |
| 301 | 1991 | 104.9 |
| 302 | 1998 | 115.4 |
| 303 | 1978 | 52.5  |
| 304 | 1983 | 49.5  |
| 305 | 1996 | 56.9  |

|     |      |       |
|-----|------|-------|
| 306 | 1997 | 43.4  |
| 307 | 1997 | 95.0  |
| 308 | 1998 | 94.1  |
| 309 | 1994 | 50.4  |
| 310 | 1996 | 91.6  |
| 311 | 1990 | 84.3  |
| 312 | 2001 | 65.0  |
| 313 | 2004 | 87.0  |
| 314 | 1992 | 117.5 |
| 315 | 1993 | 109.6 |
| 316 | 2000 | 105.4 |
| 317 | 2000 | 177.2 |
| 318 | 2008 | 205.2 |
| 319 | 2000 | 179.4 |
| 320 | 1998 | 103.0 |
| 321 | 2008 | 200.9 |
| 322 | 1995 | 241.7 |
| 323 | 2000 | 197.0 |
| 324 | 1998 | 127.5 |
| 325 | 1997 | 56.3  |
| 326 | 2005 | 65.7  |
| 327 | 1990 | 118.3 |
| 328 | 1999 | 205.0 |
| 329 | 1991 | 65.9  |
| 330 | 1989 | 160.0 |
| 331 | 1991 | 90.2  |
| 332 | 1999 | 209.9 |
| 333 | 1986 | 118.3 |
| 334 | 1993 | 95.1  |
| 335 | 2007 | 126.4 |
| 336 | 2003 | 52.2  |
| 337 | 2003 | 116.6 |
| 338 | 1993 | 137.5 |
| 339 | 1994 | 102.0 |
| 340 | 1999 | 67.3  |
| 341 | 2001 | 98.9  |
| 342 | 1994 | 96.8  |
| 343 | 1991 | 52.7  |
| 344 | 2000 | 108.0 |
| 345 | 1999 | 249.0 |
| 346 | 2005 | 346.0 |
| 347 | 2001 | 266.2 |
| 348 | 2002 | 255.7 |
| 349 | 2002 | 279.0 |

|     |      |       |
|-----|------|-------|
| 350 | 2001 | 283.0 |
| 351 | 2001 | 308.1 |
| 352 | 2001 | 292.9 |
| 353 | 2002 | 260.8 |
| 354 | 2002 | 255.2 |
| 355 | 2001 | 299.7 |
| 356 | 1997 | 352.3 |
| 357 | 1998 | 349.2 |
| 358 | 1999 | 301.6 |
| 359 | 1999 | 371.7 |
| 360 | 2001 | 124.8 |
| 361 | 2001 | 213.7 |
| 362 | 2001 | 233.8 |
| 363 | 1998 | 266.0 |
| 364 | 1998 | 269.7 |
| 365 | 2001 | 249.2 |
| 366 | 2001 | 270.9 |
| 367 | 1996 | 387.1 |
| 368 | 2001 | 240.0 |
| 369 | 2001 | 285.0 |
| 370 | 2001 | 188.4 |
| 371 | 2000 | 260.0 |
| 372 | 1998 | 272.9 |
| 373 | 2000 | 269.3 |
| 374 | 1995 | 349.1 |
| 375 | 1995 | 324.8 |
| 376 | 2000 | 568.2 |
| 377 | 1990 | 281.2 |
| 378 | 1995 | 74.3  |
| 379 | 2001 | 367.8 |
| 380 | 2001 | 94.1  |
| 381 | 2001 | 65.8  |
| 382 | 2001 | 141.9 |
| 383 | 2001 | 167.7 |
| 384 | 2001 | 386.9 |
| 385 | 2001 | 319.5 |
| 386 | 1972 | 362.4 |
| 387 | 1966 | 137.4 |
| 388 | 1995 | 124.5 |
| 389 | 2005 | 107.3 |
| 390 | 2001 | 235.2 |
| 391 | 1997 | 92.7  |
| 392 | 2001 | 17.5  |
| 393 | 2001 | 64.9  |

|     |      |       |
|-----|------|-------|
| 394 | 2001 | 95.8  |
| 395 | 2001 | 172.8 |
| 396 | 2001 | 184.9 |
| 397 | 2001 | 55.2  |
| 398 | 2001 | 107.6 |
| 399 | 2001 | 86.5  |
| 400 | 2001 | 166.5 |
| 401 | 2001 | 460.4 |
| 402 | 1991 | 59.8  |
| 403 | 1993 | 116.5 |
| 404 | 2004 | 147.7 |
| 405 | 2001 | 29.0  |
| 406 | 2001 | 78.4  |
| 407 | 2001 | 161.6 |
| 408 | 2001 | 211.6 |
| 409 | 2004 | 53.5  |
| 410 | 1984 | 91.6  |
| 411 | 1990 | 199.3 |
| 412 | 2001 | 48.7  |
| 413 | 2001 | 451.2 |
| 414 | 2001 | 562.9 |
| 415 | 2001 | 538.3 |
| 416 | 2001 | 42.3  |
| 417 | 2001 | 114.3 |
| 418 | 2001 | 193.3 |
| 419 | 2001 | 279.7 |
| 420 | 1971 | 96.5  |
| 421 | 1991 | 40.8  |
| 422 | 2001 | 40.0  |
| 423 | 2004 | 45.0  |
| 424 | 1995 | 98.6  |
| 425 | 2000 | 127.7 |
| 426 | 1997 | 124.4 |
| 427 | 1998 | 175.0 |
| 428 | 1999 | 175.0 |
| 429 | 2001 | 178.0 |
| 430 | 2005 | 61.6  |
| 431 | 2001 | 63.6  |
| 432 | 2001 | 266.7 |
| 433 | 2002 | 41.2  |
| 434 | 2003 | 51.3  |
| 435 | 1997 | 139.7 |
| 436 | 1972 | 107.3 |
| 437 | 2001 | 22.4  |

|     |      |       |
|-----|------|-------|
| 438 | 2001 | 79.9  |
| 439 | 2001 | 93.8  |
| 440 | 2001 | 230.3 |
| 441 | 2001 | 161.7 |
| 442 | 1995 | 158.6 |
| 443 | 2004 | 218.0 |
| 444 | 2006 | 218.8 |
| 445 | 2005 | 204.8 |
| 446 | 2001 | 67.3  |
| 447 | 1999 | 99.0  |
| 448 | 2001 | 97.8  |
| 449 | 2001 | 111.2 |
| 450 | 2001 | 237.8 |
| 451 | 2001 | 332.6 |
| 452 | 1996 | 47.6  |
| 453 | 1997 | 50.8  |
| 454 | 1998 | 55.0  |
| 455 | 1999 | 58.1  |
| 456 | 2000 | 50.2  |
| 457 | 2001 | 54.1  |
| 458 | 2002 | 58.7  |
| 459 | 2003 | 64.0  |
| 460 | 1970 | 104.0 |
| 461 | 1965 | 62.4  |
| 462 | 2001 | 39.0  |
| 463 | 2002 | 42.8  |
| 464 | 2001 | 50.3  |
| 465 | 1974 | 70.6  |
| 466 | 1969 | 114.4 |
| 467 | 1977 | 31.5  |
| 468 | 2000 | 29.9  |
| 469 | 1995 | 97.6  |
| 470 | 1972 | 111.7 |
| 471 | 1969 | 47.4  |
| 472 | 1965 | 62.4  |
| 473 | 1981 | 79.6  |
| 474 | 1969 | 148.5 |
| 475 | 1971 | 48.9  |
| 476 | 2000 | 160.0 |
| 477 | 1969 | 106.2 |
| 478 | 2001 | 78.5  |
| 479 | 2003 | 70.1  |
| 480 | 2000 | 130.3 |
| 481 | 1969 | 94.5  |



|     |      |       |
|-----|------|-------|
| 482 | 2000 | 42.6  |
| 483 | 2001 | 84.0  |
| 484 | 2001 | 73.1  |
| 485 | 2001 | 116.8 |
| 486 | 2001 | 343.5 |
| 487 | 2001 | 444.5 |
| 488 | 1972 | 79.7  |
| 489 | 1972 | 60.4  |
| 490 | 1999 | 98.3  |
| 491 | 2001 | 114.2 |
| 492 | 2001 | 122.3 |
| 493 | 2001 | 157.0 |
| 494 | 2001 | 36.5  |
| 495 | 2001 | 52.6  |
| 496 | 2001 | 69.0  |
| 497 | 2001 | 108.0 |
| 498 | 2001 | 54.5  |
| 499 | 2001 | 142.3 |
| 500 | 2001 | 50.1  |
| 501 | 2001 | 100.5 |
| 502 | 2001 | 159.7 |
| 503 | 2001 | 241.1 |
| 504 | 1995 | 79.6  |
| 505 | 1999 | 87.2  |
| 506 | 2001 | 124.3 |
| 507 | 2001 | 309.5 |
| 508 | 2001 | 275.6 |
| 509 | 1972 | 146.8 |
| 510 | 1995 | 73.4  |
| 511 | 1972 | 125.0 |
| 512 | 2001 | 114.1 |
| 513 | 2004 | 111.4 |
| 514 | 1972 | 62.9  |
| 515 | 1969 | 148.1 |
| 516 | 1971 | 175.0 |
| 517 | 2001 | 215.5 |
| 518 | 1993 | 72.5  |
| 519 | 2002 | 111.6 |
| 520 | 1997 | 117.6 |
| 521 | 2005 | 54.2  |
| 522 | 1975 | 126.7 |
| 523 | 2001 | 132.0 |
| 524 | 1974 | 166.9 |
| 525 | 2001 | 174.0 |

|     |      |       |
|-----|------|-------|
| 526 | 1990 | 177.7 |
| 527 | 1995 | 130.8 |
| 528 | 1997 | 38.4  |
| 529 | 1990 | 196.0 |
| 530 | 1970 | 90.5  |
| 531 | 1995 | 58.4  |
| 532 | 2001 | 52.8  |
| 533 | 2004 | 31.4  |
| 534 | 2001 | 73.1  |
| 535 | 1998 | 82.7  |
| 536 | 1969 | 129.3 |
| 537 | 2000 | 83.2  |
| 538 | 1997 | 110.3 |
| 539 | 2003 | 127.0 |
| 540 | 1999 | 97.9  |
| 541 | 2001 | 61.1  |
| 542 | 2002 | 60.8  |
| 543 | 2003 | 62.0  |
| 544 | 2004 | 62.0  |
| 545 | 2006 | 63.0  |
| 546 | 2007 | 63.7  |
| 547 | 2005 | 143.7 |
| 548 | 1999 | 102.2 |
| 549 | 2000 | 150.4 |
| 550 | 2000 | 71.3  |
| 551 | 1997 | 43.2  |
| 552 | 1975 | 81.9  |
| 553 | 1974 | 80.8  |
| 554 | 2002 | 66.6  |
| 555 | 2002 | 115.9 |
| 556 | 1969 | 56.9  |
| 557 | 1995 | 115.1 |
| 558 | 1970 | 57.2  |
| 559 | 1983 | 72.2  |
| 560 | 1999 | 86.0  |
| 561 | 1970 | 57.6  |
| 562 | 1990 | 226.2 |
| 563 | 2000 | 78.8  |
| 564 | 1999 | 74.9  |
| 565 | 2000 | 61.2  |
| 566 | 2002 | 91.9  |
| 567 | 1970 | 266.5 |
| 568 | 1971 | 235.7 |
| 569 | 2001 | 1.8   |

|     |      |     |
|-----|------|-----|
| 570 | 2001 | 0.5 |
| 571 | 2001 | 1.4 |
| 572 | 2001 | 2.5 |
| 573 | 2001 | 1.2 |
| 574 | 2001 | 1.7 |
| 575 | 2001 | 1.1 |
| 576 | 2001 | 1.9 |
| 577 | 2001 | 1.2 |
| 578 | 2001 | 2.6 |
| 579 | 2001 | 0.6 |
| 580 | 2001 | 0.6 |
| 581 | 2001 | 0.4 |
| 582 | 2001 | 0.9 |
| 583 | 2001 | 1.0 |
| 584 | 2001 | 1.2 |
| 585 | 2001 | 0.9 |
| 586 | 2001 | 1.0 |
| 587 | 2001 | 0.4 |
| 588 | 2001 | 0.3 |
| 589 | 2001 | 0.6 |
| 590 | 2001 | 1.1 |
| 591 | 2001 | 0.5 |
| 592 | 2001 | 0.4 |
| 593 | 2001 | 0.6 |
| 594 | 2001 | 0.3 |
| 595 | 2001 | 0.6 |
| 596 | 2001 | 0.2 |
| 597 | 2001 | 0.3 |
| 598 | 2001 | 0.5 |
| 599 | 2001 | 0.4 |
| 600 | 2001 | 0.3 |
| 601 | 2001 | 0.4 |
| 602 | 2001 | 1.2 |
| 603 | 2001 | 1.0 |
| 604 | 2001 | 0.6 |
| 605 | 2001 | 0.6 |
| 606 | 2001 | 0.3 |
| 607 | 2001 | 0.4 |
| 608 | 2001 | 1.7 |
| 609 | 2001 | 1.8 |
| 610 | 2001 | 0.7 |
| 611 | 2001 | 1.3 |
| 612 | 2001 | 3.1 |
| 613 | 2001 | 1.2 |

|     |      |       |
|-----|------|-------|
| 614 | 2001 | 1.6   |
| 615 | 2001 | 3.0   |
| 616 | 2001 | 3.0   |
| 617 | 2001 | 1.0   |
| 618 | 2001 | 1.3   |
| 619 | 2001 | 1.0   |
| 620 | 2001 | 1.3   |
| 621 | 2001 | 0.8   |
| 622 | 2001 | 1.3   |
| 623 | 2001 | 1.2   |
| 624 | 2001 | 2.9   |
| 625 | 2001 | 1.8   |
| 626 | 2001 | 2.0   |
| 627 | 2001 | 1.0   |
| 628 | 2001 | 3.4   |
| 629 | 2001 | 4.5   |
| 630 | 2001 | 4.4   |
| 631 | 2001 | 3.4   |
| 632 | 2001 | 1.8   |
| 633 | 2001 | 0.5   |
| 634 | 2001 | 1.4   |
| 635 | 2001 | 2.5   |
| 636 | 2001 | 1.2   |
| 637 | 2001 | 1.7   |
| 638 | 2001 | 1.1   |
| 639 | 2001 | 1.9   |
| 640 | 2001 | 1.2   |
| 641 | 2001 | 2.6   |
| 642 | 1999 | 108.0 |
| 643 | 2000 | 65.0  |
| 644 | 1999 | 56.0  |
| 645 | 2001 | 66.0  |
| 646 | 1999 | 62.0  |
| 647 | 2000 | 14.0  |
| 648 | 2000 | 62.0  |
| 649 | 2000 | 62.0  |
| 650 | 2000 | 54.9  |
| 651 | 2000 | 54.9  |
| 652 | 2008 | 62.4  |
| 653 | 2008 | 63.5  |
| 654 | 2008 | 26.4  |
| 655 | 2008 | 3.9   |
| 656 | 2006 | 61.7  |
| 657 | 1997 | 7.6   |

|     |      |       |
|-----|------|-------|
| 658 | 1997 | 6.1   |
| 659 | 1997 | 20.3  |
| 660 | 1997 | 12.8  |
| 661 | 1997 | 12.8  |
| 662 | 1997 | 6.1   |
| 663 | 1997 | 20.3  |
| 664 | 1998 | 67.2  |
| 665 | 1998 | 67.2  |
| 666 | 1998 | 67.2  |
| 667 | 1998 | 67.2  |
| 668 | 1990 | 165.0 |
| 669 | 1990 | 214.0 |
| 670 | 1990 | 154.0 |
| 671 | 1990 | 133.8 |
| 672 | 1990 | 627.0 |
| 673 | 1995 | 16.3  |
| 674 | 1995 | 7.6   |
| 675 | 1988 | 34.2  |
| 676 | 1983 | 29.5  |
| 677 | 1993 | 123.0 |
| 678 | 1969 | 86.8  |
| 679 | 1980 | 97.9  |
| 680 | 1969 | 131.1 |
| 681 | 1969 | 127.2 |
| 682 | 2008 | 279.2 |
| 683 | 2008 | 181.3 |
| 684 | 1988 | 299.4 |
| 685 | 1974 | 131.7 |
| 686 | 1979 | 168.7 |
| 687 | 1999 | 86.3  |
| 688 | 1991 | 172.4 |
| 689 | 1991 | 143.4 |
| 690 | 1994 | 202.3 |
| 691 | 1993 | 100.7 |
| 692 | 1993 | 68.8  |
| 693 | 1993 | 126.9 |
| 694 | 1999 | 131.5 |
| 695 | 1999 | 136.6 |
| 696 | 1995 | 153.5 |
| 697 | 1995 | 65.1  |
| 698 | 1995 | 78.3  |
| 699 | 1994 | 111.7 |
| 700 | 1994 | 157.3 |
| 701 | 1994 | 61.7  |

|     |      |       |
|-----|------|-------|
| 702 | 1994 | 61.1  |
| 703 | 1998 | 114.0 |
| 704 | 2000 | 138.5 |
| 705 | 1997 | 97.1  |
| 706 | 2000 | 146.2 |
| 707 | 1999 | 129.7 |
| 708 | 1998 | 141.3 |
| 709 | 1997 | 71.1  |
| 710 | 1997 | 101.5 |
| 711 | 2001 | 134.2 |
| 712 | 1998 | 163.4 |
| 713 | 1980 | 187.3 |
| 714 | 1979 | 106.6 |
| 715 | 1979 | 123.2 |
| 716 | 1979 | 109.6 |
| 717 | 1979 | 86.2  |
| 718 | 1979 | 115.1 |
| 719 | 1979 | 141.5 |
| 720 | 1980 | 155.6 |
| 721 | 1980 | 112.9 |
| 722 | 1987 | 186.0 |
| 723 | 1989 | 99.6  |
| 724 | 1989 | 96.8  |
| 725 | 1989 | 119.4 |
| 726 | 1989 | 138.7 |
| 727 | 1989 | 178.3 |
| 728 | 1989 | 124.8 |
| 729 | 2001 | 266.2 |
| 730 | 1997 | 352.3 |
| 731 | 1998 | 349.2 |
| 732 | 1999 | 301.6 |
| 733 | 1993 | 348.7 |
| 734 | 1999 | 364.0 |
| 735 | 2002 | 255.7 |
| 736 | 2002 | 378.7 |
| 737 | 2003 | 364.6 |
| 738 | 2001 | 124.8 |
| 739 | 2001 | 213.7 |
| 740 | 2001 | 233.8 |
| 741 | 1998 | 266.0 |
| 742 | 1998 | 269.7 |
| 743 | 2001 | 249.2 |
| 744 | 2001 | 270.9 |
| 745 | 2002 | 313.7 |

|     |      |       |
|-----|------|-------|
| 746 | 2002 | 279.0 |
| 747 | 1996 | 387.1 |
| 748 | 2001 | 240.0 |
| 749 | 2001 | 285.0 |
| 750 | 2001 | 188.4 |
| 751 | 2001 | 283.0 |
| 752 | 2000 | 260.0 |
| 753 | 1998 | 272.9 |
| 754 | 2000 | 269.4 |
| 755 | 1995 | 349.1 |
| 756 | 2002 | 260.8 |
| 757 | 2002 | 255.2 |
| 758 | 2001 | 299.2 |
| 759 | 1984 | 343.6 |
| 760 | 1996 | 158.4 |
| 761 | 2007 | 153.7 |
| 762 | 2006 | 255.8 |
| 763 | 2008 | 209.5 |
| 764 | 2006 | 238.4 |
| 765 | 2008 | 273.4 |
| 766 | 2006 | 212.6 |
| 767 | 2010 | 193.7 |
| 768 | 2006 | 262.7 |
| 769 | 1997 | 319.4 |
| 770 | 1986 | 176.2 |
| 771 | 2010 | 221.3 |
| 772 | 1986 | 173.9 |
| 773 | 2007 | 245.7 |
| 774 | 1999 | 216.2 |
| 775 | 2003 | 558.6 |
| 776 | 2007 | 453.4 |
| 777 | 2003 | 406.8 |
| 778 | 2003 | 345.5 |
| 779 | 2003 | 300.0 |
| 780 | 2007 | 345.2 |
| 781 | 2003 | 308.2 |
| 782 | 2004 | 321.4 |
| 783 | 2007 | 352.3 |
| 784 | 2006 | 215.0 |
| 785 | 2006 | 146.1 |
| 786 | 1993 | 332.0 |
| 787 | 2008 | 320.8 |
| 788 | 2007 | 235.3 |
| 789 | 2010 | 188.8 |

|     |      |       |
|-----|------|-------|
| 790 | 2006 | 242.6 |
| 791 | 1988 | 210.2 |
| 792 | 1983 | 212.7 |
| 793 | 2003 | 363.8 |
| 794 | 2004 | 369.1 |
| 795 | 2006 | 411.6 |
| 796 | 2006 | 234.0 |
| 797 | 2003 | 408.9 |
| 798 | 2003 | 439.4 |
| 799 | 1983 | 308.0 |
| 800 | 2001 | 109.6 |
| 801 | 1996 | 70.2  |
| 802 | 1984 | 390.6 |
| 803 | 2000 | 322.4 |
| 804 | 2002 | 350.8 |
| 805 | 1985 | 151.7 |
| 806 | 2001 | 167.0 |
| 807 | 1972 | 152.2 |
| 808 | 2008 | 240.7 |
| 809 | 2006 | 188.7 |
| 810 | 2007 | 125.0 |
| 811 | 2008 | 224.7 |
| 812 | 2004 | 378.6 |
| 813 | 1996 | 268.4 |
| 814 | 1994 | 220.8 |
| 815 | 2000 | 260.3 |
| 816 | 2008 | 157.8 |
| 817 | 2010 | 132.4 |
| 818 | 1993 | 625.5 |
| 819 | 2005 | 419.0 |
| 820 | 2006 | 746.9 |
| 821 | 1994 | 253.6 |
| 822 | 2003 | 360.4 |
| 823 | 2002 | 319.6 |
| 824 | 1978 | 331.5 |
| 825 | 1981 | 251.5 |
| 826 | 1996 | 321.3 |
| 827 | 2006 | 225.3 |
| 828 | 1999 | 209.3 |
| 829 | 1980 | 448.1 |
| 830 | 1981 | 179.8 |
| 831 | 2008 | 348.6 |
| 832 | 2010 | 246.0 |
| 833 | 2010 | 238.4 |



|     |      |       |
|-----|------|-------|
| 834 | 2010 | 199.0 |
| 835 | 2010 | 239.4 |
| 836 | 2010 | 527.9 |
| 837 | 2010 | 433.8 |
| 838 | 2010 | 330.2 |
| 839 | 2006 | 485.8 |
| 840 | 2008 | 287.8 |
| 841 | 1990 | 277.4 |
| 842 | 2002 | 239.2 |
| 843 | 2007 | 245.8 |
| 844 | 2007 | 228.2 |
| 845 | 2009 | 206.0 |
| 846 | 2003 | 207.2 |
| 847 | 2003 | 220.8 |
| 848 | 2003 | 193.0 |
| 849 | 1996 | 422.9 |
| 850 | 2006 | 269.9 |
| 851 | 2008 | 140.9 |
| 852 | 2006 | 167.8 |
| 853 | 2007 | 133.3 |
| 854 | 1987 | 199.9 |
| 855 | 2006 | 250.2 |
| 856 | 1993 | 283.5 |
| 857 | 2004 | 404.5 |
| 858 | 2006 | 281.1 |
| 859 | 2001 | 144.5 |
| 860 | 1999 | 253.9 |
| 861 | 2007 | 205.5 |
| 862 | 2007 | 232.0 |
| 863 | 2007 | 256.2 |
| 864 | 2007 | 210.6 |
| 865 | 1956 | 375.8 |
| 866 | 1987 | 189.7 |
| 867 | 1996 | 210.8 |
| 868 | 1995 | 286.9 |
| 869 | 1990 | 267.9 |
| 870 | 2003 | 156.9 |
| 871 | 1996 | 170.7 |
| 872 | 1995 | 351.1 |
| 873 | 1995 | 232.0 |
| 874 | 1996 | 93.9  |
| 875 | 1993 | 99.3  |
| 876 | 2003 | 417.2 |
| 877 | 2003 | 455.2 |

|     |      |       |
|-----|------|-------|
| 878 | 2003 | 533.4 |
| 879 | 2008 | 395.0 |
| 880 | 1997 | 391.2 |
| 881 | 1996 | 542.5 |
| 882 | 1980 | 302.2 |
| 883 | 2007 | 208.8 |
| 884 | 1991 | 214.1 |
| 885 | 2008 | 421.5 |
| 886 | 1987 | 276.9 |
| 887 | 2006 | 420.4 |
| 888 | 2004 | 209.0 |
| 889 | 2007 | 214.8 |
| 890 | 2008 | 219.4 |
| 891 | 2006 | 255.6 |
| 892 | 1999 | 253.2 |
| 893 | 2003 | 421.4 |
| 894 | 2007 | 426.5 |
| 895 | 2007 | 231.6 |
| 896 | 2001 | 115.2 |
| 897 | 2008 | 138.9 |
| 898 | 1986 | 289.2 |
| 899 | 2010 | 257.8 |
| 900 | 2008 | 200.1 |
| 901 | 2008 | 193.6 |
| 902 | 2009 | 182.4 |
| 903 | 2006 | 266.4 |
| 904 | 2004 | 275.3 |
| 905 | 1991 | 284.7 |
| 906 | 2004 | 444.6 |
| 907 | 1995 | 265.4 |
| 908 | 1998 | 285.4 |
| 909 | 2003 | 217.0 |
| 910 | 1996 | 292.7 |
| 911 | 2006 | 363.9 |
| 912 | 2006 | 193.1 |
| 913 | 2008 | 400.2 |
| 914 | 2008 | 366.6 |
| 915 | 2008 | 383.0 |
| 916 | 2008 | 437.6 |
| 917 | 1994 | 183.2 |
| 918 | 2002 | 203.7 |
| 919 | 1987 | 290.1 |
| 920 | 1996 | 71.0  |
| 921 | 2006 | 275.7 |

|     |      |       |
|-----|------|-------|
| 922 | 2002 | 298.9 |
| 923 | 2008 | 249.6 |
| 924 | 2010 | 234.8 |
| 925 | 2009 | 148.2 |
| 926 | 2009 | 169.3 |
| 927 | 2008 | 151.2 |
| 928 | 1995 | 348.7 |
| 929 | 2008 | 450.2 |
| 930 | 2008 | 435.2 |
| 931 | 2008 | 331.9 |
| 932 | 2008 | 365.0 |
| 933 | 2008 | 331.5 |
| 934 | 2008 | 258.5 |
| 935 | 2008 | 257.9 |
| 936 | 1997 | 253.8 |
| 937 | 1998 | 239.0 |
| 938 | 2007 | 218.4 |
| 939 | 2007 | 157.0 |
| 940 | 2003 | 320.0 |
| 941 | 2008 | 172.0 |
| 942 | 2009 | 235.4 |
| 943 | 2005 | 271.2 |
| 944 | 2006 | 247.1 |
| 945 | 2006 | 194.0 |
| 946 | 2007 | 285.6 |
| 947 | 2007 | 239.5 |
| 948 | 2002 | 514.1 |
| 949 | 2002 | 483.3 |
| 950 | 2002 | 578.6 |
| 951 | 1986 | 336.4 |
| 952 | 2007 | 130.5 |
| 953 | 2007 | 333.2 |
| 954 | 2000 | 413.8 |
| 955 | 2000 | 275.1 |
| 956 | 1996 | 460.1 |
| 957 | 1996 | 396.9 |
| 958 | 2002 | 376.1 |
| 959 | 2002 | 344.5 |
| 960 | 2002 | 496.5 |
| 961 | 2002 | 749.1 |
| 962 | 2007 | 455.8 |
| 963 | 2007 | 419.8 |
| 964 | 2000 | 375.9 |
| 965 | 2002 | 389.1 |

|     |      |       |
|-----|------|-------|
| 966 | 2006 | 597.1 |
| 967 | 1988 | 415.6 |
| 968 | 1988 | 344.8 |
| 969 | 1988 | 365.8 |
| 970 | 1988 | 427.0 |
| 971 | 1988 | 406.5 |
| 972 | 1988 | 407.4 |
| 973 | 1988 | 292.4 |
| 974 | 1988 | 371.0 |
| 975 | 1988 | 364.6 |
| 976 | 1988 | 313.8 |
| 977 | 1993 | 651.6 |
| 978 | 1994 | 612.7 |
| 979 | 1994 | 576.5 |
| 980 | 1993 | 463.3 |
| 981 | 1993 | 412.0 |
| 982 | 1993 | 503.9 |
| 983 | 1998 | 302.9 |
| 984 | 2000 | 505.2 |
| 985 | 2000 | 539.5 |
| 986 | 1994 | 497.6 |
| 987 | 1994 | 439.0 |
| 988 | 2006 | 425.7 |
| 989 | 2007 | 461.3 |
| 990 | 1993 | 396.2 |
| 991 | 2006 | 510.3 |
| 992 | 2005 | 130.6 |

---

**Table S3** Collected pan-tropical woody residence time ( $\tau_w$ , years)

| ID | Country     | Latitude | Longitude | Plot size<br>(ha) | DBH<br>(cm) | AGB<br>(Mg DM) | Above-ground<br>wood production<br>(Mg DM year <sup>-1</sup> ) | Method               | Woody Residence Time<br>( $\tau_w$ , years) |
|----|-------------|----------|-----------|-------------------|-------------|----------------|----------------------------------------------------------------|----------------------|---------------------------------------------|
|    | Ghana       | 6.56     | -2.22     | 0.6               | 10          | 307            | 3.32                                                           | Biomass/productivity | 92.4                                        |
| 1  | Ghana       | 6.48     | -2.17     | 0.88              | 10          | 254            | 2.74                                                           | Biomass/productivity | 113.5                                       |
| 2  | Ivory Coast | 5.33     | -4.17     | 0.3               | 9.5         | 510            | 5.08                                                           | Biomass/productivity | 100.5                                       |
| 3  | Cameroon    | 2.13     | 9.82      | 1                 | 10          | 250            | 2.85                                                           | Biomass/productivity | 87.7                                        |
| 4  | Cameroon    | 2.13     | 9.82      | 1                 | 10          | 131            | 2.29                                                           | Biomass/productivity | 57.2                                        |
| 5  | Cameroon    | 2.13     | 9.82      | 1                 | 10          | 172            | 1.78                                                           | Biomass/productivity | 96.7                                        |
| 6  | Ghana       | 4.85     | -2.10     | 1                 | 10          | 406            | 7.84                                                           | Biomass/productivity | 51.82                                       |
| 7  | Ghana       | 4.8      | -2.05     | 1                 | 10          | 187            | 5.27                                                           | Biomass/productivity | 35.48                                       |
| 8  | Cameroon    | 3.33     | 12.72     | 1                 | 10          | 561            | 8.11                                                           | Biomass/productivity | 69.1                                        |
| 9  | Cameroon    | 3.33     | 12.72     | 1                 | 10          | 555            | 5.99                                                           | Biomass/productivity | 92.6                                        |
| 10 | Cameroon    | 3.36     | 12.72     | 1                 | 10          | 543            | 4.26                                                           | Biomass/productivity | 127.5                                       |
| 11 | Cameroon    | 3.36     | 12.73     | 1                 | 10          | 298            | 4.93                                                           | Biomass/productivity | 60.5                                        |
| 12 | Cameroon    | 3.32     | 12.76     | 1                 | 10          | 334            | 4.02                                                           | Biomass/productivity | 83                                          |
| 13 | Cameroon    | 3.33     | 12.76     | 1                 | 10          | 247            | 4.51                                                           | Biomass/productivity | 54.8                                        |
| 14 | DRC         | 1.6      | 28.5      | 10                | 10          | 375            | 6.58                                                           | Biomass/productivity | 57.0                                        |
| 15 | DRC         | 1.3      | 28.6      | 10                | 10          | 525            | 5.73                                                           | Biomass/productivity | 91.6                                        |
| 16 | Ivory Coast | 5.38     | -4.03     | 0.2               | 9.5         | 450            | 5.96                                                           | Biomass/productivity | 75.5                                        |
| 17 | Uganda      | 1.43     | 31.3      | 1.86              | 20          |                |                                                                | 1/stem turnover      | 52.4                                        |
| 18 | Ghana       | 6.19     | -0.55     | 1                 | 10          |                |                                                                | 1/stem turnover      | 47.9                                        |
| 19 | Ghana       | 6.19     | -0.55     | 1                 | 10          |                |                                                                | 1/stem turnover      | 36.1                                        |
| 20 | Tanzania    | -8.59    | 35.87     | 0.25              | 10          |                |                                                                | 1/stem turnover      | 45.0                                        |

|    |          |       |        |      |    |     |      |                      |      |
|----|----------|-------|--------|------|----|-----|------|----------------------|------|
| 21 | Colombia | -3.72 | -70.31 | 1    | 10 | 281 | 6.80 | Biomass/productivity | 41.3 |
| 22 | Colombia | -3.72 | -70.31 | 1    | 10 | 276 | 7.60 | Biomass/productivity | 36.3 |
| 23 | Peru     | -3.95 | -73.43 | 0.44 | 10 | 270 | 5.18 | Biomass/productivity | 52.0 |
| 24 | Peru     | -3.95 | -73.43 | 0.4  | 10 | 266 | 6.48 | Biomass/productivity | 41.1 |
| 25 | Peru     | -3.95 | -73.43 | 0.44 | 10 | 241 | 6.22 | Biomass/productivity | 38.8 |
| 26 | Peru     | -3.95 | -73.43 | 0.48 | 10 | 288 | 7.28 | Biomass/productivity | 39.5 |
| 27 | Ecuador  | -0.53 | -76.43 | 1    | 10 | 322 | 7.38 | Biomass/productivity | 43.6 |
| 28 | Panama   | 9.17  | -79.85 | 50   | 10 | 292 | 4.72 | Biomass/productivity | 61.9 |
| 29 | Brazil   | -2.4  | -59.9  | 1    | 10 | 339 | 4.40 | Biomass/productivity | 77.0 |
| 30 | Brazil   | -2.4  | -59.9  | 1    | 10 | 251 | 3.80 | Biomass/productivity | 66.0 |
| 31 | Brazil   | -2.4  | -59.9  | 1    | 10 | 304 | 4.48 | Biomass/productivity | 67.9 |
| 32 | Brazil   | -2.4  | -59.9  | 1    | 10 | 319 | 3.36 | Biomass/productivity | 94.9 |
| 33 | Brazil   | -2.4  | -59.9  | 3    | 10 | 295 | 4.56 | Biomass/productivity | 64.7 |
| 34 | Brazil   | -2.4  | -59.9  | 3    | 10 | 355 | 3.72 | Biomass/productivity | 95.4 |
| 35 | Brazil   | -2.4  | -59.9  | 2    | 10 | 349 | 3.74 | Biomass/productivity | 93.3 |
| 36 | Brazil   | -2.4  | -60    | 2    | 10 | 379 | 4.8  | Biomass/productivity | 78.9 |
| 37 | Brazil   | -2.4  | -60    | 2    | 10 | 356 | 4.52 | Biomass/productivity | 78.8 |
| 38 | Brazil   | -2.4  | -60    | 9    | 10 | 342 | 4.18 | Biomass/productivity | 81.9 |
| 39 | Brazil   | -2.4  | -59.9  | 1    | 10 | 327 | 4.66 | Biomass/productivity | 70.2 |
| 40 | Brazil   | -2.63 | -60.17 | 1    | 10 | 352 | 5.12 | Biomass/productivity | 68.7 |
| 41 | Brazil   | -2.63 | -60.17 | 1    | 10 | 369 | 5.28 | Biomass/productivity | 69.9 |
| 42 | Brazil   | -2.63 | -60.17 | 1    | 10 | 328 | 5.1  | Biomass/productivity | 64.3 |
| 43 | Brazil   | -2.63 | -60.17 | 1    | 10 | 372 | 4.92 | Biomass/productivity | 75.7 |
| 44 | Brazil   | -2.63 | -60.17 | 1    | 10 | 316 | 5.26 | Biomass/productivity | 60.1 |
| 45 | Brazil   | -2.63 | -60.17 | 1    | 10 | 355 | 5.36 | Biomass/productivity | 66.3 |
| 46 | Ecuador  | -0.7  | -76.48 | 1    | 10 | 289 | 10.5 | Biomass/productivity | 27.6 |

|    |           |        |        |      |    |     |      |                      |      |
|----|-----------|--------|--------|------|----|-----|------|----------------------|------|
| 47 | Ecuador   | −0.7   | −76.47 | 1    | 10 | 222 | 7.86 | Biomass/productivity | 28.2 |
| 48 | Venezuela | 9.25   | −72    | 1    | 10 | 187 | 5.8  | Biomass/productivity | 32.3 |
| 49 | Venezuela | 9.25   | −72    | 1    | 10 | 305 | 8.28 | Biomass/productivity | 36.8 |
| 50 | Brazil    | −1.7   | −51.53 | 1    | 10 | 365 | 4.36 | Biomass/productivity | 83.6 |
| 51 | Brazil    | −1.72  | −51.45 | 1    | 10 | 383 | 4.3  | Biomass/productivity | 90   |
| 52 | Brazil    | −1.7   | −51.53 | 1    | 10 | 330 | 4.36 | Biomass/productivity | 75.7 |
| 53 | Brazil    | −1.7   | −51.53 | 1    | 10 | 379 | 4.9  | Biomass/productivity | 77.3 |
| 54 | Bolivia   | −14.54 | −61.48 | 1    | 10 | 214 | 5.6  | Biomass/productivity | 38.2 |
| 55 | Bolivia   | −14.53 | −61.48 | 1    | 10 | 234 | 7.66 | Biomass/productivity | 30.5 |
| 56 | Bolivia   | −14.35 | −61.16 | 1    | 10 | 125 | 5.28 | Biomass/productivity | 23.6 |
| 57 | Peru      | −12.5  | −68.95 | 1    | 10 | 283 | 6.6  | Biomass/productivity | 42.9 |
| 58 | Peru      | −12.5  | −68.95 | 1    | 10 | 249 | 7.78 | Biomass/productivity | 32   |
| 59 | Peru      | −12.49 | −69.11 | 1    | 10 | 250 | 7.68 | Biomass/productivity | 32.6 |
| 60 | Peru      | −12.49 | −69.11 | 1    | 10 | 289 | 8.06 | Biomass/productivity | 36   |
| 61 | Venezuela | 6.5    | −61.5  | 0.25 | 10 | 398 | 6.1  | Biomass/productivity | 50   |
| 62 | Venezuela | 6.5    | −61.5  | 0.25 | 10 | 477 | 5    | Biomass/productivity | 73.3 |
| 63 | Venezuela | 6.5    | −61.5  | 0.25 | 10 | 297 | 6.92 | Biomass/productivity | 34.3 |
| 64 | Venezuela | 6.5    | −61.5  | 0.25 | 10 | 258 | 6.54 | Biomass/productivity | 40.8 |
| 65 | Colombia  | −4.09  | −69.91 | 1    | 10 | 322 | 5.2  | Biomass/productivity | 61.9 |
| 66 | Panama    | 8.75   | −82.85 | 0.64 | 10 | 346 | 4.56 | Biomass/productivity | 75.8 |
| 67 | Bolivia   | −14.56 | −60.75 | 1    | 10 | 249 | 8.32 | Biomass/productivity | 30   |
| 68 | Bolivia   | −14.56 | −60.74 | 1    | 10 | 271 | 6.06 | Biomass/productivity | 44.7 |
| 69 | Brazil    | −2.63  | −60.17 | 5    | 10 | 301 | 4.42 | Biomass/productivity | 68   |
| 70 | Brazil    | −2.63  | −60.17 | 5    | 10 | 291 | 4.04 | Biomass/productivity | 72   |
| 71 | Brazil    | −1     | −52.05 | 1    | 10 | 387 | 4.96 | Biomass/productivity | 78   |
| 72 | Ecuador   | −1.07  | −77.6  | 1    | 10 | 248 | 7.18 | Biomass/productivity | 34.5 |

|    |          |        |        |      |    |     |       |                      |      |
|----|----------|--------|--------|------|----|-----|-------|----------------------|------|
| 73 | Ecuador  | -1.07  | -77.67 | 1    | 10 | 263 | 8.42  | Biomass/productivity | 31.2 |
| 74 | Ecuador  | -1.07  | -77.67 | 1    | 10 | 319 | 8.7   | Biomass/productivity | 36.6 |
| 75 | Ecuador  | -1.07  | -77.67 | 0.92 | 10 | 287 | 8.46  | Biomass/productivity | 33.9 |
| 76 | Peru     | -4.92  | -73.73 | 1    | 10 | 237 | 10.18 | Biomass/productivity | 27.5 |
| 77 | Peru     | -4.92  | -73.73 | 1    | 10 | 245 | 10.86 | Biomass/productivity | 35.5 |
| 78 | Peru     | -4.92  | -73.73 | 1    | 10 | 288 | 10.18 | Biomass/productivity | 29.8 |
| 79 | Bolivia  | -16.0  | -62.7  | 1    | 10 | 127 | 5.4   | Biomass/productivity | 23.4 |
| 80 | Bolivia  | -16.0  | -62.7  | 1    | 10 | 130 | 4.2   | Biomass/productivity | 31.1 |
| 81 | Colombia | 1.16   | -77.99 | 25   | 10 | 160 | 4.43  | Biomass/productivity | 36.2 |
| 82 | Bolivia  | -14.4  | -61.13 | 1    | 10 | 173 | 4.9   | Biomass/productivity | 35.4 |
| 83 | Bolivia  | -14.4  | -61.13 | 1    | 10 | 204 | 6.86  | Biomass/productivity | 29.7 |
| 84 | Brazil   | -19.2  | -40.03 | 2.5  | 10 | 335 | 5.35  | Biomass/productivity | 62.5 |
| 85 | Bolivia  | -14.61 | -60.87 | 1    | 10 | 240 | 4.96  | Biomass/productivity | 48.4 |
| 86 | Bolivia  | -14.6  | -60.85 | 1    | 10 | 285 | 5.36  | Biomass/productivity | 53.2 |
| 87 | Peru     | -11.88 | -71.35 | 0.97 | 10 | 299 | 6.02  | Biomass/productivity | 49.6 |
| 88 | Peru     | -11.88 | -71.35 | 2    | 10 | 267 | 7.08  | Biomass/productivity | 37.7 |
| 89 | Peru     | -11.88 | -71.35 | 2    | 10 | 288 | 8.24  | Biomass/productivity | 34.9 |
| 90 | Brazil   | -5.73  | -49.05 | 2    | 10 | 214 | 6.02  | Biomass/productivity | 35.5 |
| 91 | Brazil   | -5.7   | -49.03 | 2    | 10 | 299 | 5.68  | Biomass/productivity | 52.6 |
| 92 | Brazil   | -5.7   | -49    | 2    | 10 | 327 | 5.26  | Biomass/productivity | 62.1 |
| 93 | Peru     | -3.78  | -73.5  | 1    | 10 | 296 | 5.22  | Biomass/productivity | 56.6 |
| 94 | Brazil   | -1.45  | -48.45 | 2    | 10 | 286 | 5.06  | Biomass/productivity | 56.5 |
| 95 | French   | 4.08   | -52.67 | 10   | 10 | 356 | 8.66  | Biomass/productivity | 41.1 |
| 96 | French   | 4.08   | -52.67 | 12   | 10 | 384 | 8.04  | Biomass/productivity | 47.8 |
| 97 | Peru     | -11.93 | -71.25 | 1    | 10 | 263 | 7.58  | Biomass/productivity | 34.7 |
| 98 | French   | 5.25   | -52.83 | 6    | 10 | 392 | 4.51  | Biomass/productivity | 86.8 |



|     |           |        |        |      |    |     |      |                      |      |
|-----|-----------|--------|--------|------|----|-----|------|----------------------|------|
| 99  | French    | 5.25   | -52.83 | 6    | 10 | 417 | 4.27 | Biomass/productivity | 97.7 |
| 100 | French    | 5.25   | -52.83 | 6    | 10 | 415 | 4.31 | Biomass/productivity | 96.2 |
| 101 | French    | 5.25   | -52.83 | 6    | 10 | 427 | 4.14 | Biomass/productivity | 103  |
| 102 | French    | 5.25   | -52.83 | 6    | 10 | 415 | 4.15 | Biomass/productivity | 99.9 |
| 103 | French    | 5.25   | -52.83 | 6    | 10 | 435 | 4.51 | Biomass/productivity | 96.5 |
| 104 | Colombia  | -0.65  | -72.07 | 1.8  | 10 | 417 | 10.1 | Biomass/productivity | 41.3 |
| 105 | Colombia  | -0.65  | -72.07 | 1.8  | 10 | 618 | 7.29 | Biomass/productivity | 84.8 |
| 106 | French    | 5.25   | -53    | 0.78 | 5  | 324 | 7.04 | Biomass/productivity | 46   |
| 107 | French    | 5.25   | -53    | 1    | 5  | 342 | 6.15 | Biomass/productivity | 55.5 |
| 108 | Colombia  | 6.75   | -75.1  | 3.3  | 1  | 258 | 11.3 | Biomass/productivity | 22.8 |
| 109 | Venezuela | 8      | -61.75 | 0.25 | 10 |     | 5.8  | Biomass/productivity | 56.7 |
| 110 | Venezuela | 8      | -61.75 | 0.25 | 10 |     | 5.56 | Biomass/productivity | 70   |
| 111 | Venezuela | 1.93   | -67.05 | 0.25 | 10 | 296 | 4.66 | Biomass/productivity | 63.6 |
| 112 | Venezuela | 1.75   | -67    | 0.25 | 10 | 253 | 4.17 | Biomass/productivity | 60.6 |
| 113 | Peru      | -13.05 | -71.55 | 1    | 10 | 206 | 3.27 | Biomass/productivity | 62.9 |
| 114 | Peru      | -3.23  | -72.9  | 1    | 10 | 279 | 6.24 | Biomass/productivity | 44.6 |
| 115 | Peru      | -3.23  | -72.9  | 1    | 10 | 287 | 6.78 | Biomass/productivity | 42.4 |
| 116 | Peru      | -12.83 | -69.3  | 0.96 | 10 | 282 | 7.1  | Biomass/productivity | 39.7 |
| 117 | Peru      | -12.83 | -69.28 | 1    | 10 | 260 | 5.2  | Biomass/productivity | 50   |
| 118 | Peru      | -12.83 | -69.27 | 1    | 10 | 257 | 6.16 | Biomass/productivity | 41.8 |
| 119 | Peru      | -12.83 | -69.28 | 1    | 10 | 266 | 5.4  | Biomass/productivity | 49.3 |
| 120 | Peru      | -12.83 | -69.28 | 0.42 | 10 | 289 | 7.54 | Biomass/productivity | 38.3 |
| 121 | Peru      | -12.85 | -69.28 | 1    | 10 | 260 | 6.98 | Biomass/productivity | 37.3 |
| 122 | Brazil    | -13.04 | -52.23 | 1    | 10 | 150 | 5.26 | Biomass/productivity | 28.6 |
| 123 | Brazil    | -2.9   | -54.95 | 1    | 10 | 290 | 6.24 | Biomass/productivity | 46.5 |
| 124 | Brazil    | -2.75  | -55    | 1    | 10 | 296 | 5.16 | Biomass/productivity | 57.4 |

|     |           |        |        |       |     |     |      |                      |       |
|-----|-----------|--------|--------|-------|-----|-----|------|----------------------|-------|
| 125 | Brazil    | -2.75  | -55    | 1     | 10  | 374 | 5.46 | Biomass/productivity | 68.5  |
| 126 | Brazil    | -2.75  | -55    | 1     | 10  | 377 | 5    | Biomass/productivity | 75.5  |
| 127 | Ecuador   | -0.63  | -76.14 | 0.8   | 10  | 261 | 6.84 | Biomass/productivity | 38.1  |
| 128 | Ecuador   | -0.64  | -76.15 | 1     | 10  | 255 | 5.26 | Biomass/productivity | 48.5  |
| 129 | Peru      | -12.95 | -71.53 | 1     | 10  | 159 | 2.7  | Biomass/productivity | 58.9  |
| 130 | Peru      | -13.1  | -71.58 | 1     | 10  | 94  | 2.01 | Biomass/productivity | 46.8  |
| 131 | Peru      | -13.1  | -71.58 | 1     | 10  | 132 | 3.17 | Biomass/productivity | 41.6  |
| 132 | Peru      | -13.07 | -71.55 | 1     | 10  | 77  | 1.58 | Biomass/productivity | 48.7  |
| 133 | Peru      | -13.07 | -71.55 | 1     | 10  | 111 | 1.58 | Biomass/productivity | 70.2  |
| 134 | Peru      | -13.18 | -71.58 | 1     | 10  | 130 | 2.42 | Biomass/productivity | 53.8  |
| 135 | Peru      | -3.43  | -72.85 | 1     | 10  | 299 | 7.82 | Biomass/productivity | 38.3  |
| 136 | Ecuador   | -0.69  | -76.4  | 24    | 10  | 263 | 6.59 | Biomass/productivity | 39.9  |
| 137 | Bolivia   | -16.53 | -64.58 | 1     | 10  |     |      | 1/stem turnover      | 39.2  |
| 138 | Brazil    | -10.57 | -68.31 | 1     | 10  |     |      | 1/stem turnover      | 30.7  |
| 139 | Colombia  | -3.06  | -70    | 1     | 10  |     |      | 1/stem turnover      | 33.1  |
| 140 | Brazil    | 3.25   | -61.37 | 0.75  | 10  | 321 | 2.73 | Biomass/productivity | 117.6 |
| 141 | Brazil    | 3.25   | -61.37 | 0.75  | 10  | 374 | 3.23 | Biomass/productivity | 115.8 |
| 142 | Brazil    | 3.25   | -61.37 | 0.75  | 10  | 360 | 3.39 | Biomass/productivity | 106.1 |
| 143 | Brazil    | -10.82 | -68.78 | 1     | 10  |     |      | 1/stem turnover      | 36.2  |
| 144 | Bolivia   | -17    | -64.77 | 1     | 10  |     |      | 1/stem turnover      | 36.2  |
| 145 | Thailand  | 16.82  | 101.29 | 50    | 10  | 203 | 3.51 | Biomass/productivity | 57.8  |
| 146 | China     | 18.62  | 108.75 | 1.3   | 5   | 229 | 4.8  | Biomass/productivity | 47.7  |
| 147 | Cambodia  | 12.7   | 104.9  | 23.04 | 10  | 256 | 5.35 | Biomass/productivity | 47.9  |
| 148 | Malaysia  | 4.19   | 114.02 | 52    | 10  | 479 | 7.05 | Biomass/productivity | 68    |
| 149 | China     | 21.92  | 101.25 | 1     | 2   | 295 | 8.48 | Biomass/productivity | 34.8  |
| 150 | Indonesia | 6.5    | 116.5  | 1     | 4.8 | 437 | 8.14 | Biomass/productivity | 53.7  |

|     |           |        |        |            |     |     |       |                      |       |
|-----|-----------|--------|--------|------------|-----|-----|-------|----------------------|-------|
| 151 | Indonesia | 6.5    | 116.5  | 1          | 4.8 | 554 | 16.51 | Biomass/productivity | 33.6  |
| 152 | Indonesia | 6.08   | 116.55 | 1          | 4.8 | 309 | 2.71  | Biomass/productivity | 113.9 |
| 153 | Indonesia | 6.08   | 116.55 | 0.2        | 4.8 | 246 | 1.9   | Biomass/productivity | 129   |
| 154 | Indonesia | 6.08   | 116.55 | 0.5        | 4.8 | 294 | 4.26  | Biomass/productivity | 69    |
| 155 | Indonesia | 6.08   | 116.55 | 0.25       | 4.8 | 308 | 2.49  | Biomass/productivity | 123.8 |
| 156 | Indonesia | 6.08   | 116.55 | 0.2        | 4.8 | 215 | 1.85  | Biomass/productivity | 116   |
| 157 | Indonesia | 6.08   | 116.55 | 0.2        | 4.8 | 238 | 1.85  | Biomass/productivity | 128.4 |
| 158 | Indonesia | 6.08   | 116.55 | 0.2        | 4.8 | 122 | 1.31  | Biomass/productivity | 93    |
| 159 | Malaysia  | 2.35   | 102.19 | 50         | 10  | 320 | 6.86  | Biomass/productivity | 46.7  |
| 160 | Sri Lanka | 6.4    | 80.4   | 25         | 10  | 337 | 7.33  | Biomass/productivity | 46    |
| 161 | India     | 12.42  | 75.42  | 0.32       | 30  | 379 | 6.87  | Biomass/productivity | 55.1  |
| 162 | India     | 12.42  | 75.42  | 0.32       | 30  | 425 | 6.99  | Biomass/productivity | 60.8  |
| 163 | India     | 12.42  | 75.42  | 0.32       | 30  | 348 | 4.61  | Biomass/productivity | 75.6  |
| 164 | India     | 12.42  | 75.42  | 0.32       | 30  | 502 | 7.33  | Biomass/productivity | 68.5  |
| 165 | Malaysia  | -3.42  | 101.7  | 2          | 10  |     |       | 1/stem turnover      | 54.7  |
| 166 | Malaysia  | 4.97   | 117.8  | 4          | 10  |     |       | 1/stem turnover      | 51.1  |
| 167 | India     | 14.27  | 74.42  | 2.7        | 10  |     |       | 1/stem turnover      | 64.8  |
| 168 | Malaysia  | 5      | 119    | 0.6 – 2.0  | 10  |     |       | 1/stem turnover      | 74.2  |
| 169 | India     | 14.16  | 74.42  | 1.09       | 10  |     |       | 1/stem turnover      | 64.8  |
| 170 | India     | 14.17  | 74.44  | 2.7        | 10  |     |       | 1/stem turnover      | 48.3  |
| 171 | Malaysia  | 5.17   | 117.93 | 1-1.81     | 10  |     |       | 1/stem turnover      | 57.1  |
| 172 | Indonesia | -0.83  | 100.33 | 0.91-1     | 10  |     |       | 1/stem turnover      | 34.1  |
| 173 | Malaysia  | 2.47   | 101.92 | 2          | 10  |     |       | 1/stem turnover      | 54.9  |
| 174 | Australia | -17.1  | 145.6  | 0.2 – 1.68 | 10  |     |       | 1/stem turnover      | 83.6  |
| 175 | Australia | -16.52 | 145.1  | 0.5        | 10  |     |       | 1/stem turnover      | 121.1 |
| 176 | Australia | -17.08 | 145.3  | 0.5        | 10  |     |       | 1/stem turnover      | 106.6 |
